# Supplementary material for: A conserved NR5A1-responsive enhancer regulates SRY in testis-determination
Source: PubMed Central journal article supplement (PMC10981742; doi:10.1038/s41467-024-47162-2), 2024-03-30
Supplement: 41467_2024_47162_MOESM1_ESM.pdf [file 41467_2024_47162_MOESM1_ESM.pdf]

**Supplementary Figure 01**

Phylogenetic tree describing the evolutionary relationships between the 83 mammalian species shown in Supplementary\_Data\_03.clc and Supplementary\_Data\_04.clc.

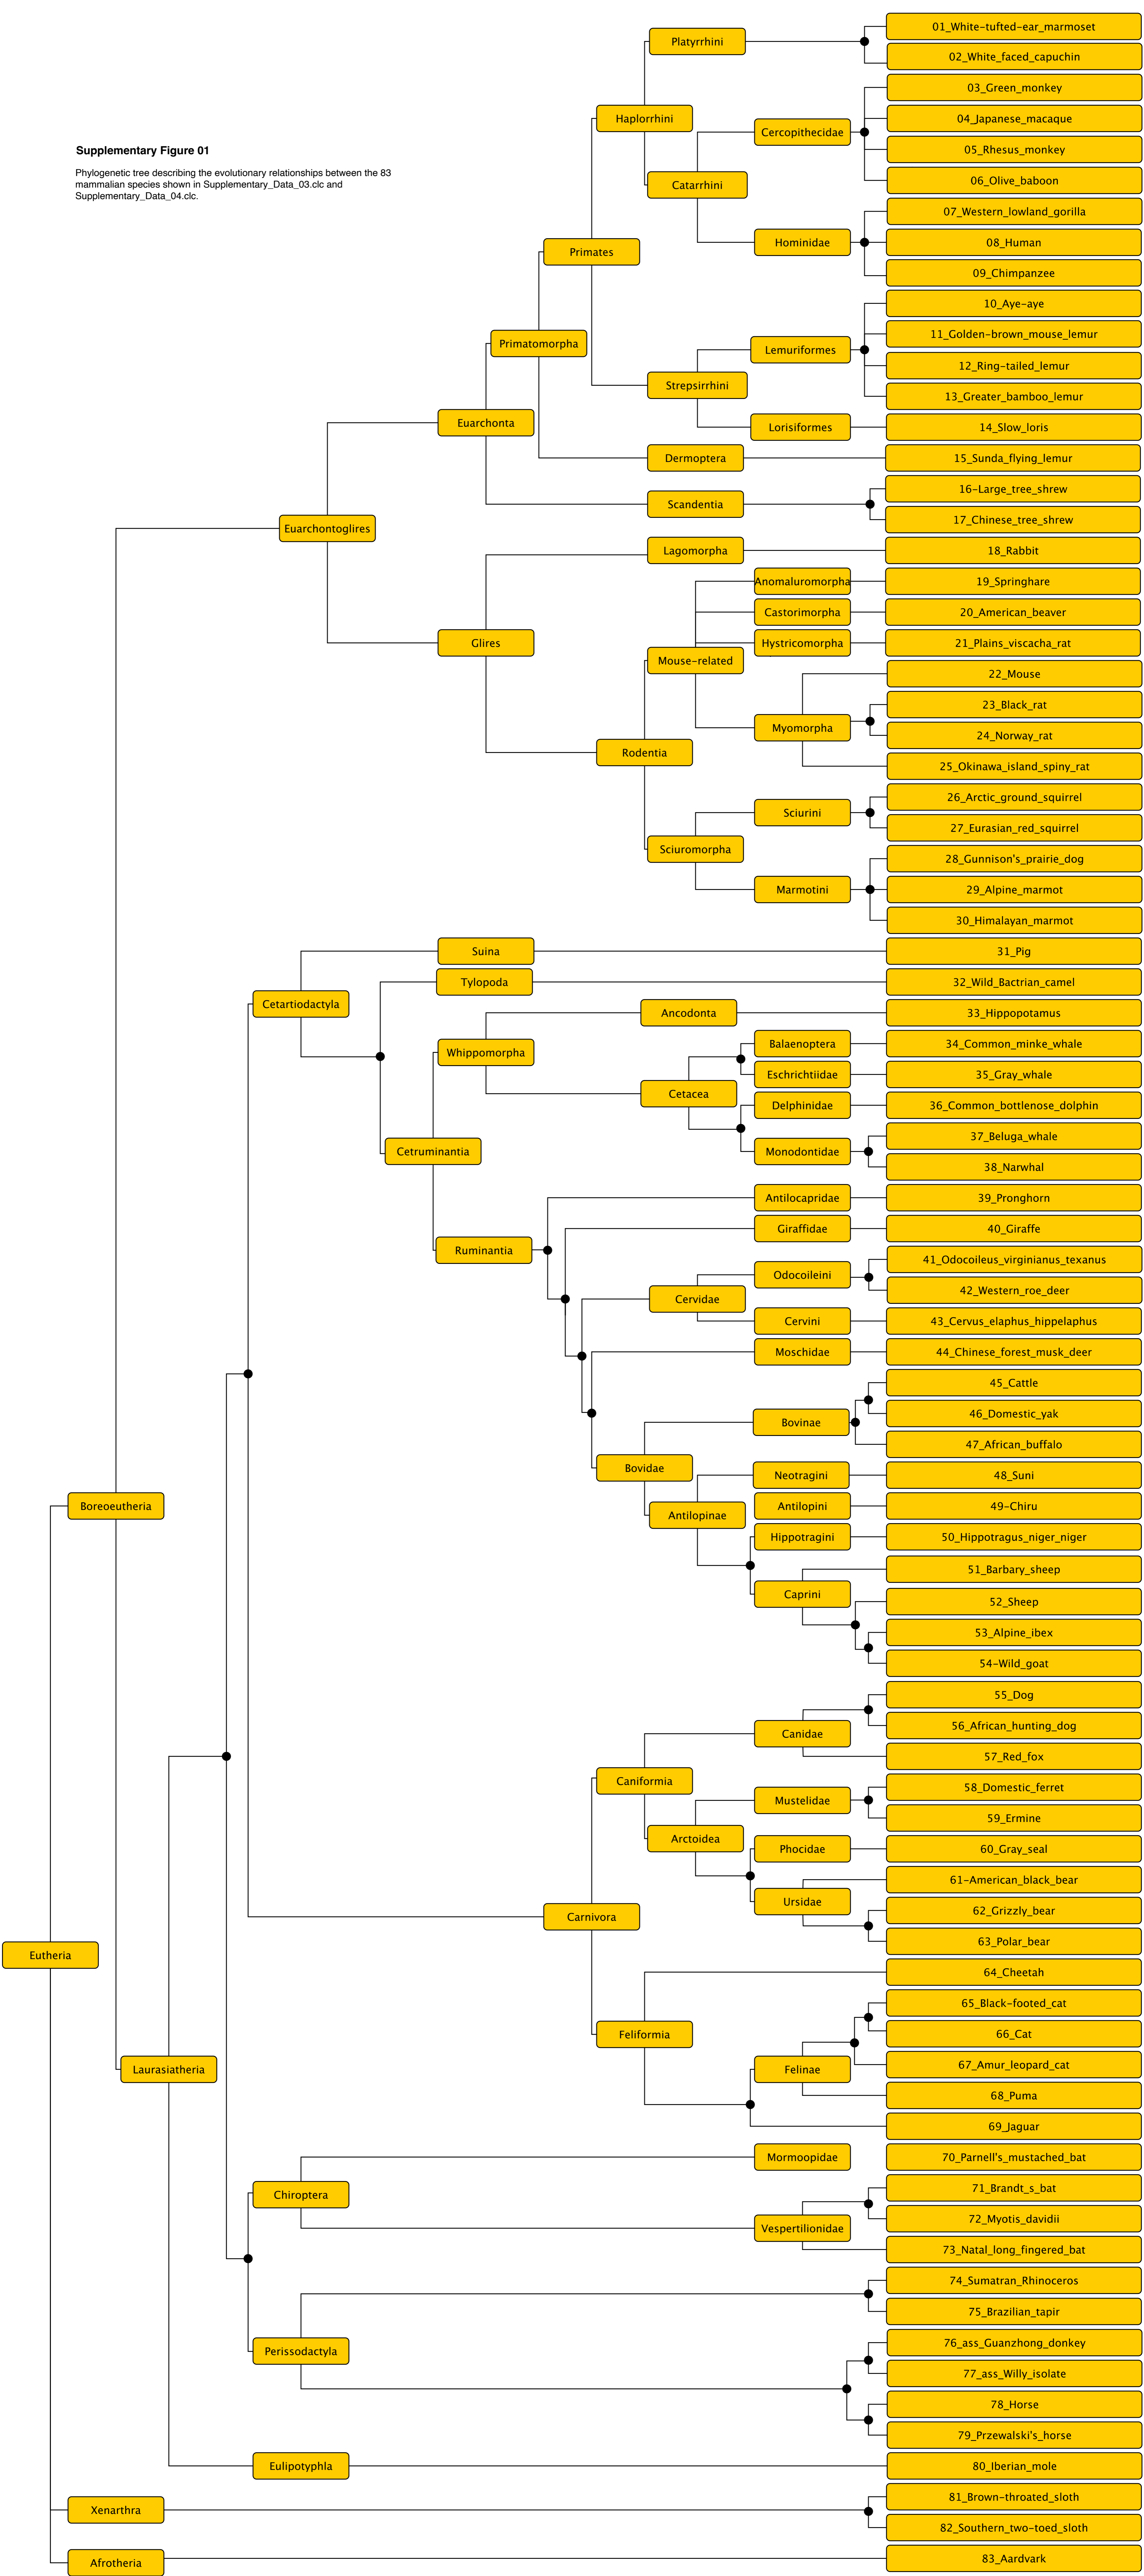

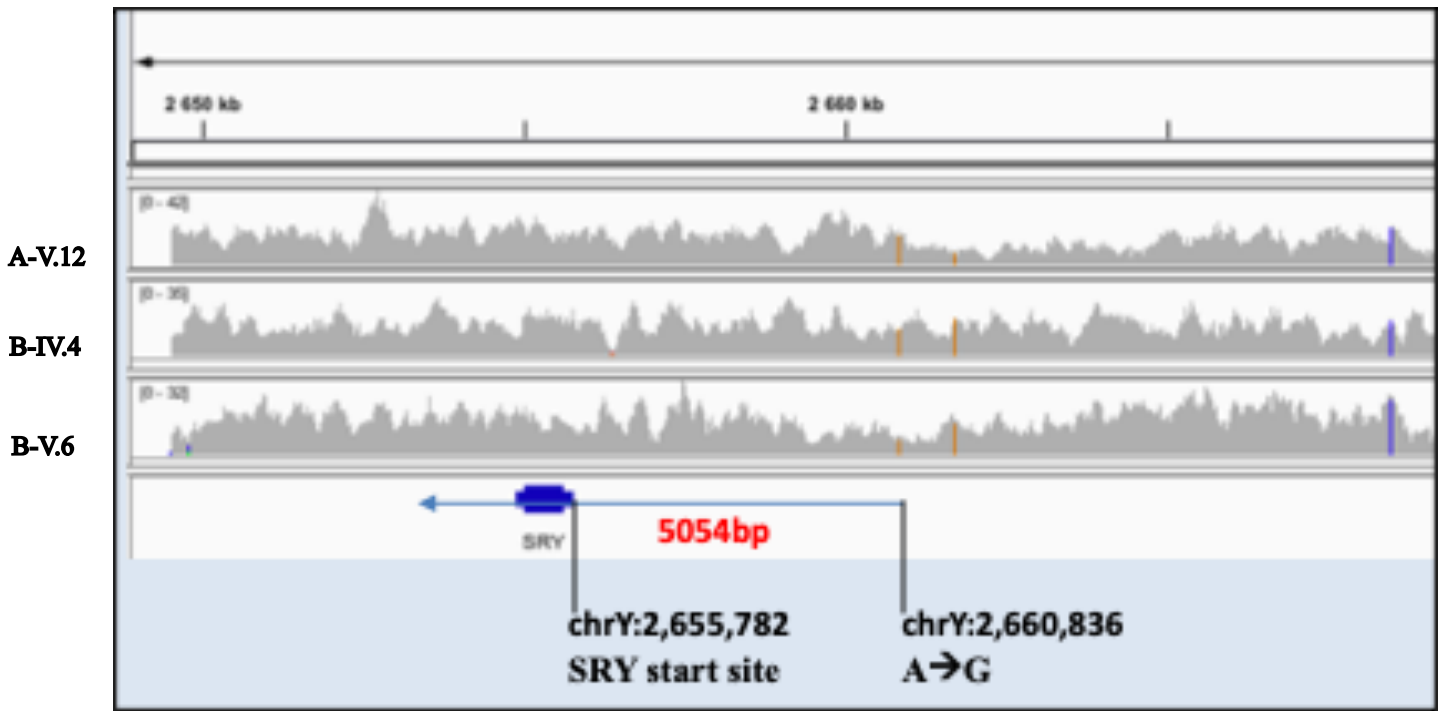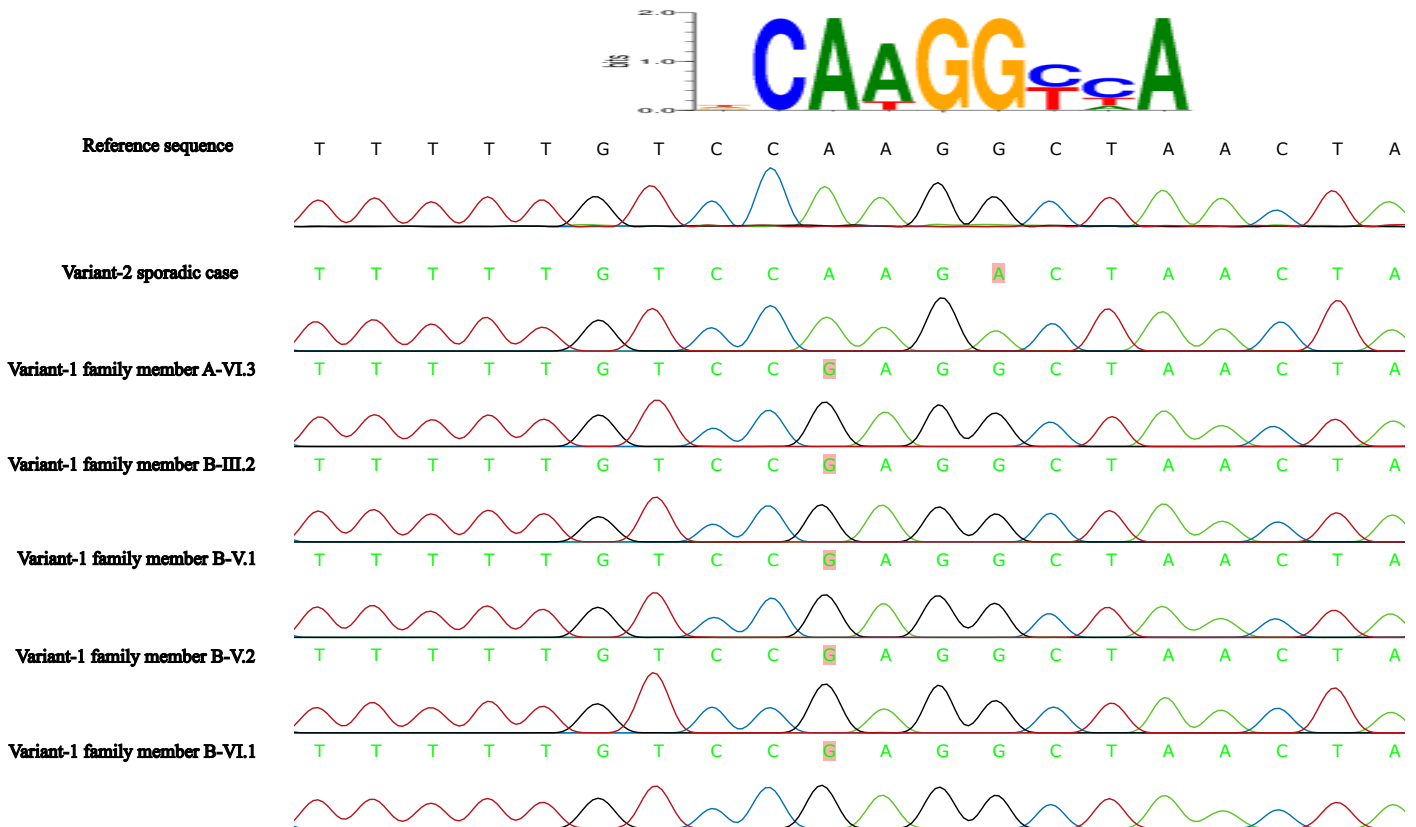

## Supplementary Figure 02

Window showing

- the SRY locus from whole genome sequencing (the reference genome is GRC37),
- the Sanger sequencing of 5 members of the Variant-1 family, and
- the Sanger sequencing of the Variant-2 woman with Complete Gonadal Dysgenesis centered on the NR5A1 binding site.

**a**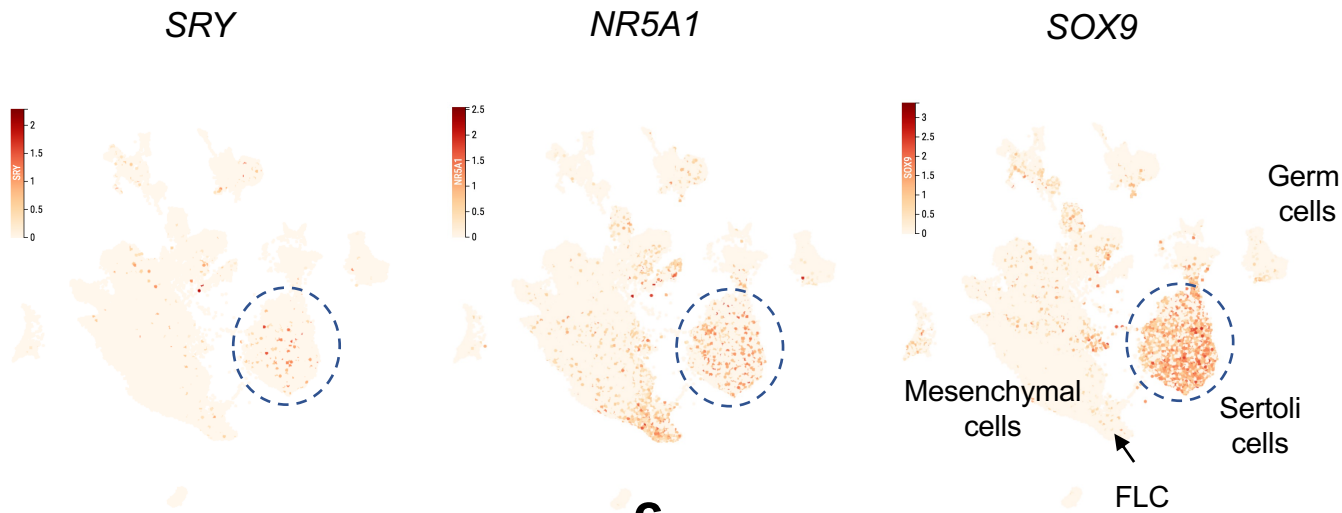**b**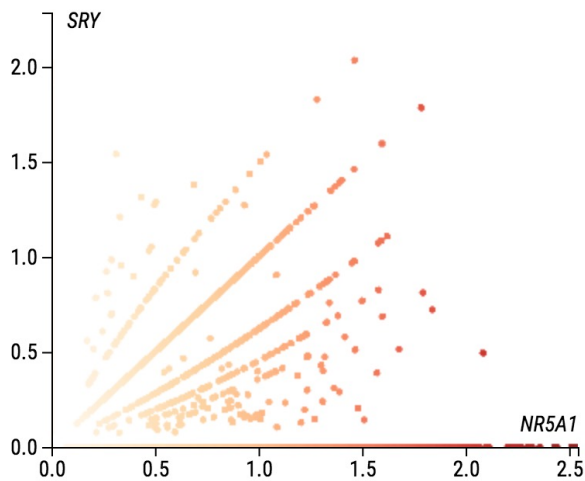**c**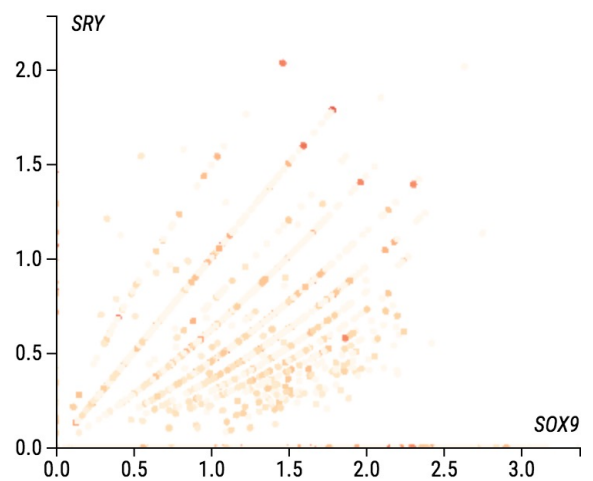

### Supplementary Figure 03

#### Expression of *SRY* and *NR5A1* in human fetal testis using single-cell RNA-sequencing.

**a** Feature plots of *SRY*, *NR5A1* and *SOX9* showing predominant expression of these genes in the developing Sertoli cell cluster.

**b** Scatterplot showing the correlation of *SRY* and *NR5A1* expression in single cells.

**c** Scatterplot showing the correlation of *SRY* and *SOX9* expression in single cells. Analysis represents n=133,181 integrated cells between 7 and 19 weeks post conception.

These data were generated by the Vento-Tormo group at the Wellcome Sanger Institute, Hinxton, UK and can be accessed using CZ CELLxGENE from <https://www.reproductivecellatlas.org/gonads/human-main-male/> (Garcia-Alonso, L., Lorenzi, V., Mazzeo, C.I., et al. Single-cell roadmap of human gonadal development. Nature 607, 540–547, 2022; <https://doi.org/10.1038/s41586-022-04918-4>). This work is licensed under a Creative Commons Attribution-BY 4.0 International License (<https://creativecommons.org/licenses/by/4.0/>). Major cell clusters are shown and detailed annotation is provided in the reference above. FLC, fetal Leydig cells.

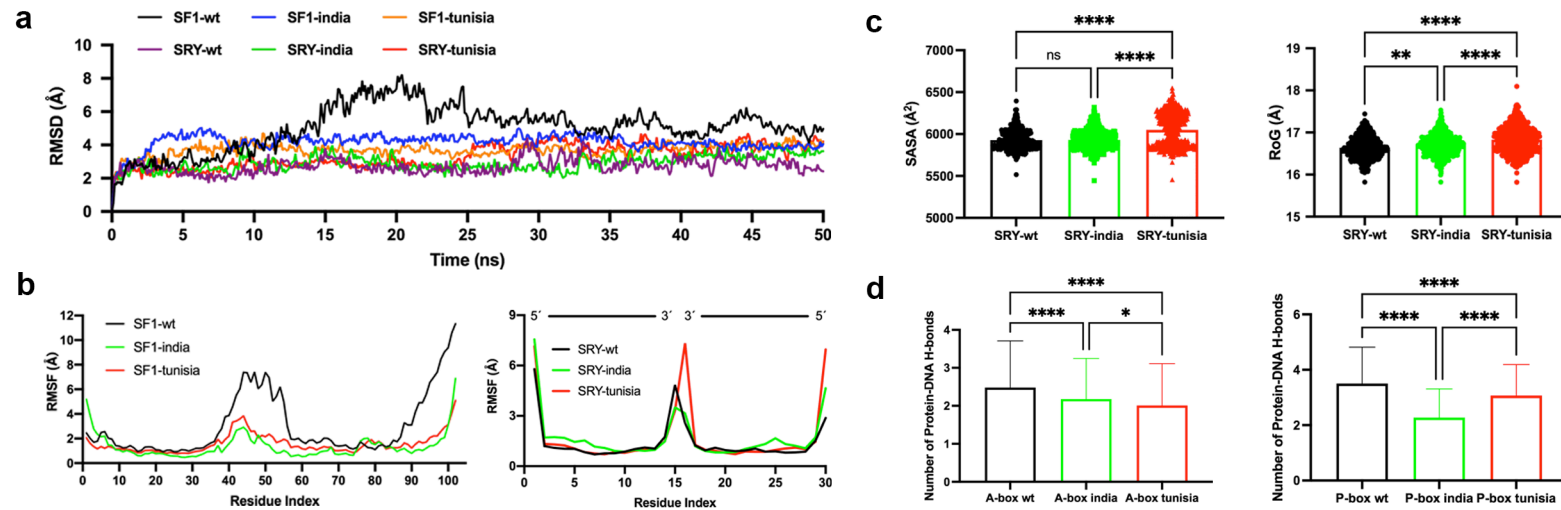

### Supplementary Figure 04

Molecular dynamics of NR5A1 and response element interactions.

a. Root-mean square deviation (RMSD) representing the global movement for NR5A1 and target DNA. Reduced movement of NR5A1 with the variant response elements was seen compared to the wild-type response element.

b. Root-mean square fluctuation (RMSF) representing local movements for individual residues on protein and nucleic acid during simulations suggested reduced flexibility with the variant response elements. RMSD and RMSF were defined for C $\alpha$  and C5' for protein and nucleic acid residues respectively.

c. Solvent accessible surface-area (SASA) and radius of gyration (RoG) to assess the compactness for the wild-type NR5A1 response element and variants during simulation.

d. Number of H-bond interactions between the NR5A1 A-box and P-box with the NR5A1 response elements during simulation showed reduced interaction for the variants.

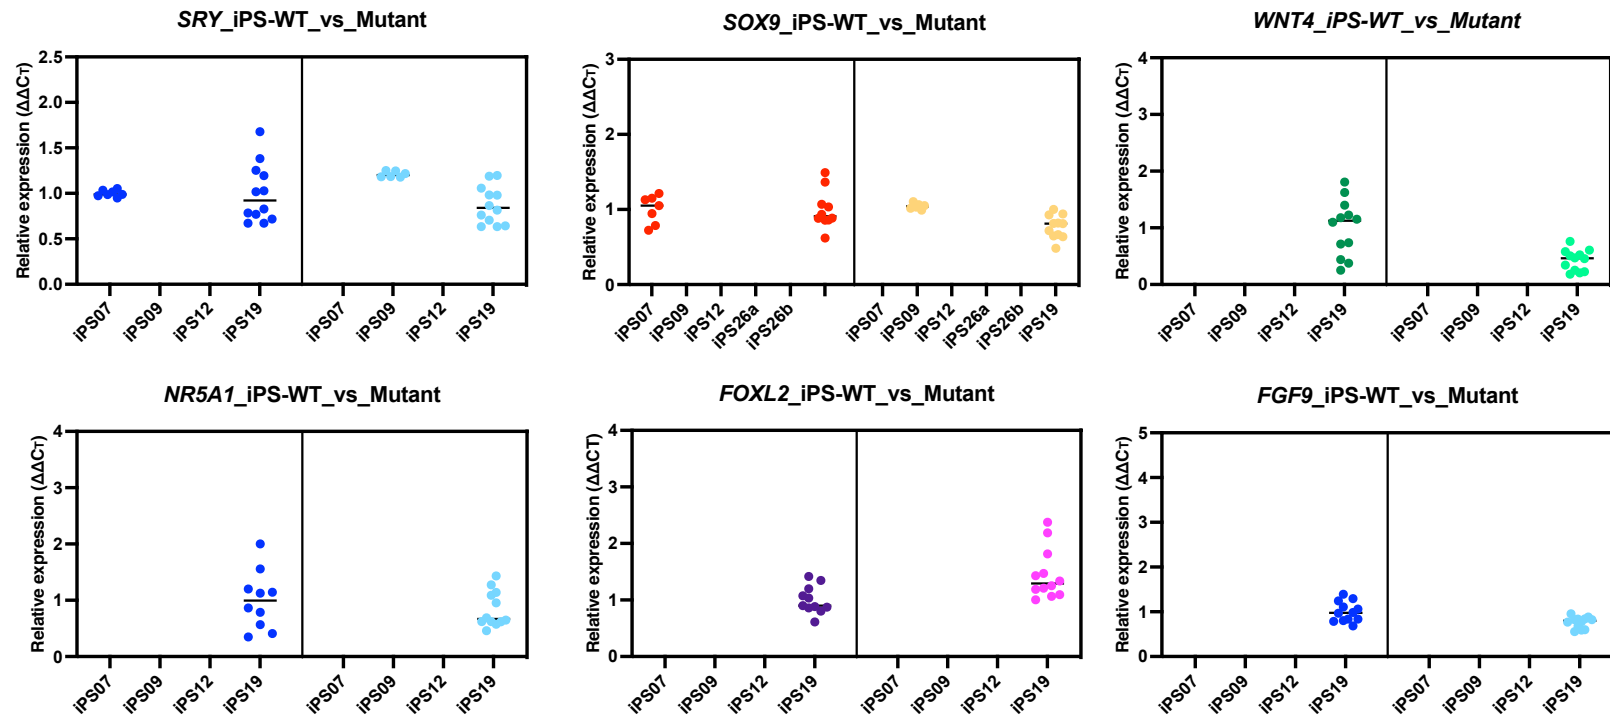

## Supplementary Figure 05

Supplementary to Figure 05

This PDF file is an export of data from Supplementary\_Data\_29.

rt-qPCR experiments showing the expression kinetics for the *SRY*, *SOX9*, *NR5A1*, *WNT4*, *FOXL2* and *FGF9* genes comparing wild type and mutant samples, with detailed analysis provided for each experiment in undifferentiated hiPSC.

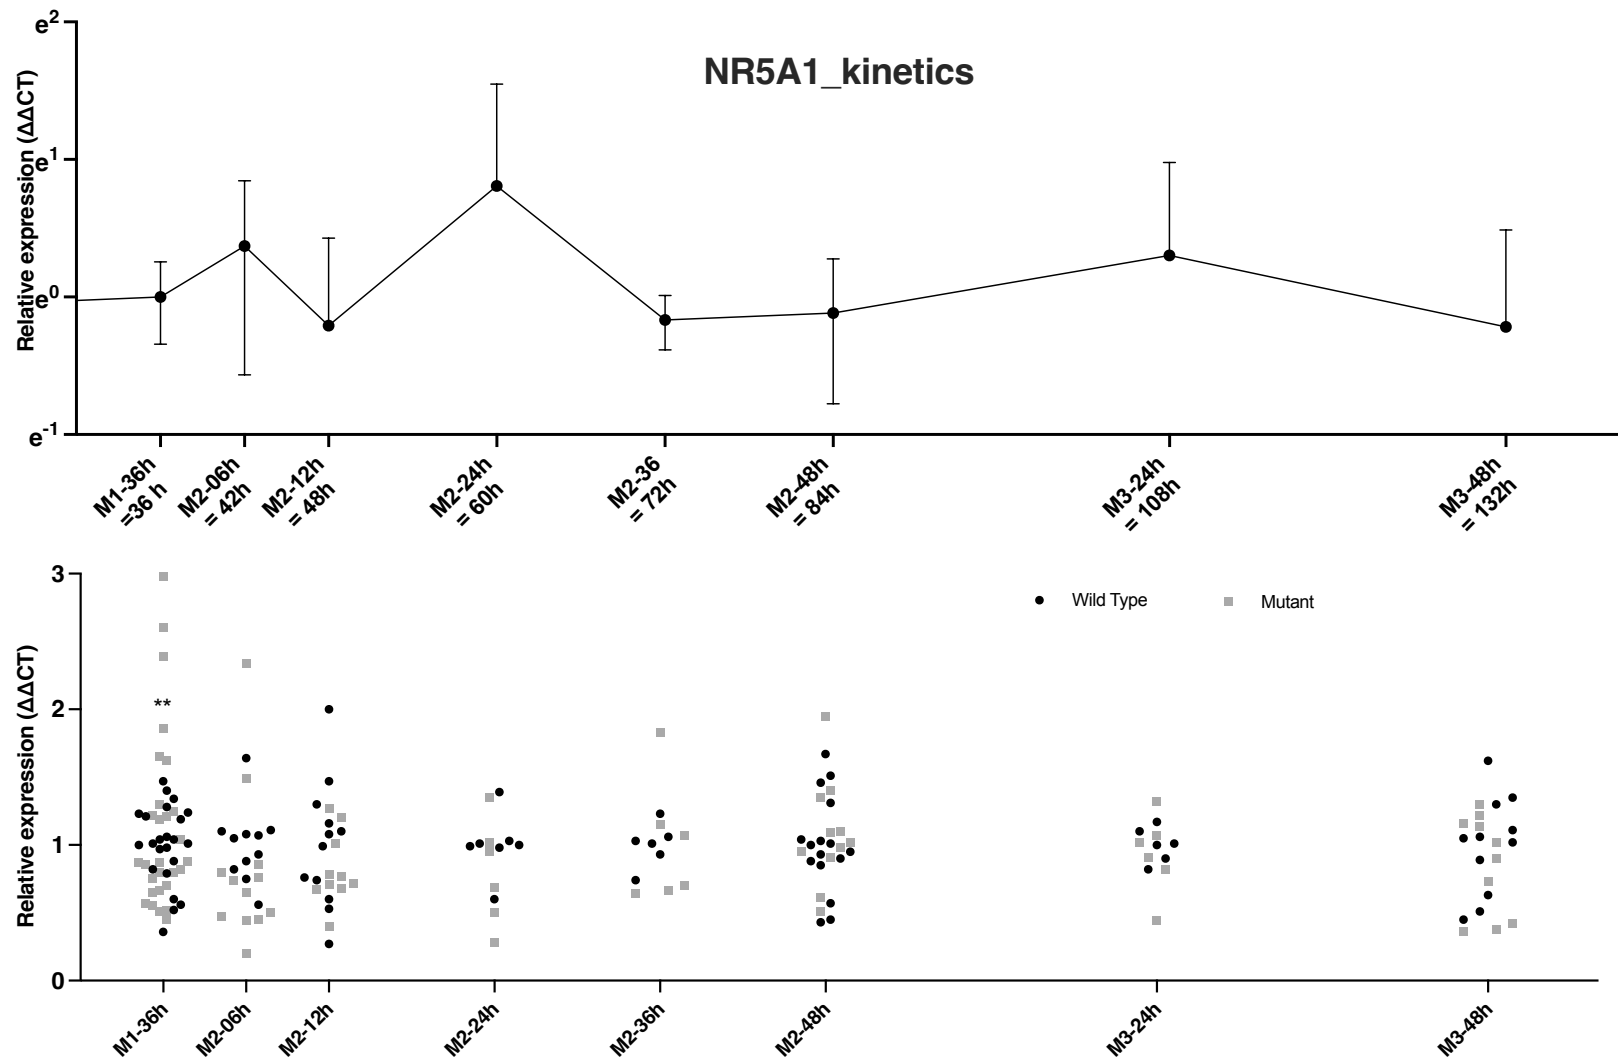

## Supplementary Figure 06

Supplementary to Figure 05

This PDF file is an export of data from Supplementary\_Data\_29.

Comparison between Wild Type and Mutant hiPSC lines. The expression levels of *NR5A1* and *FGF9* are detailed for each experiment and timepoint.

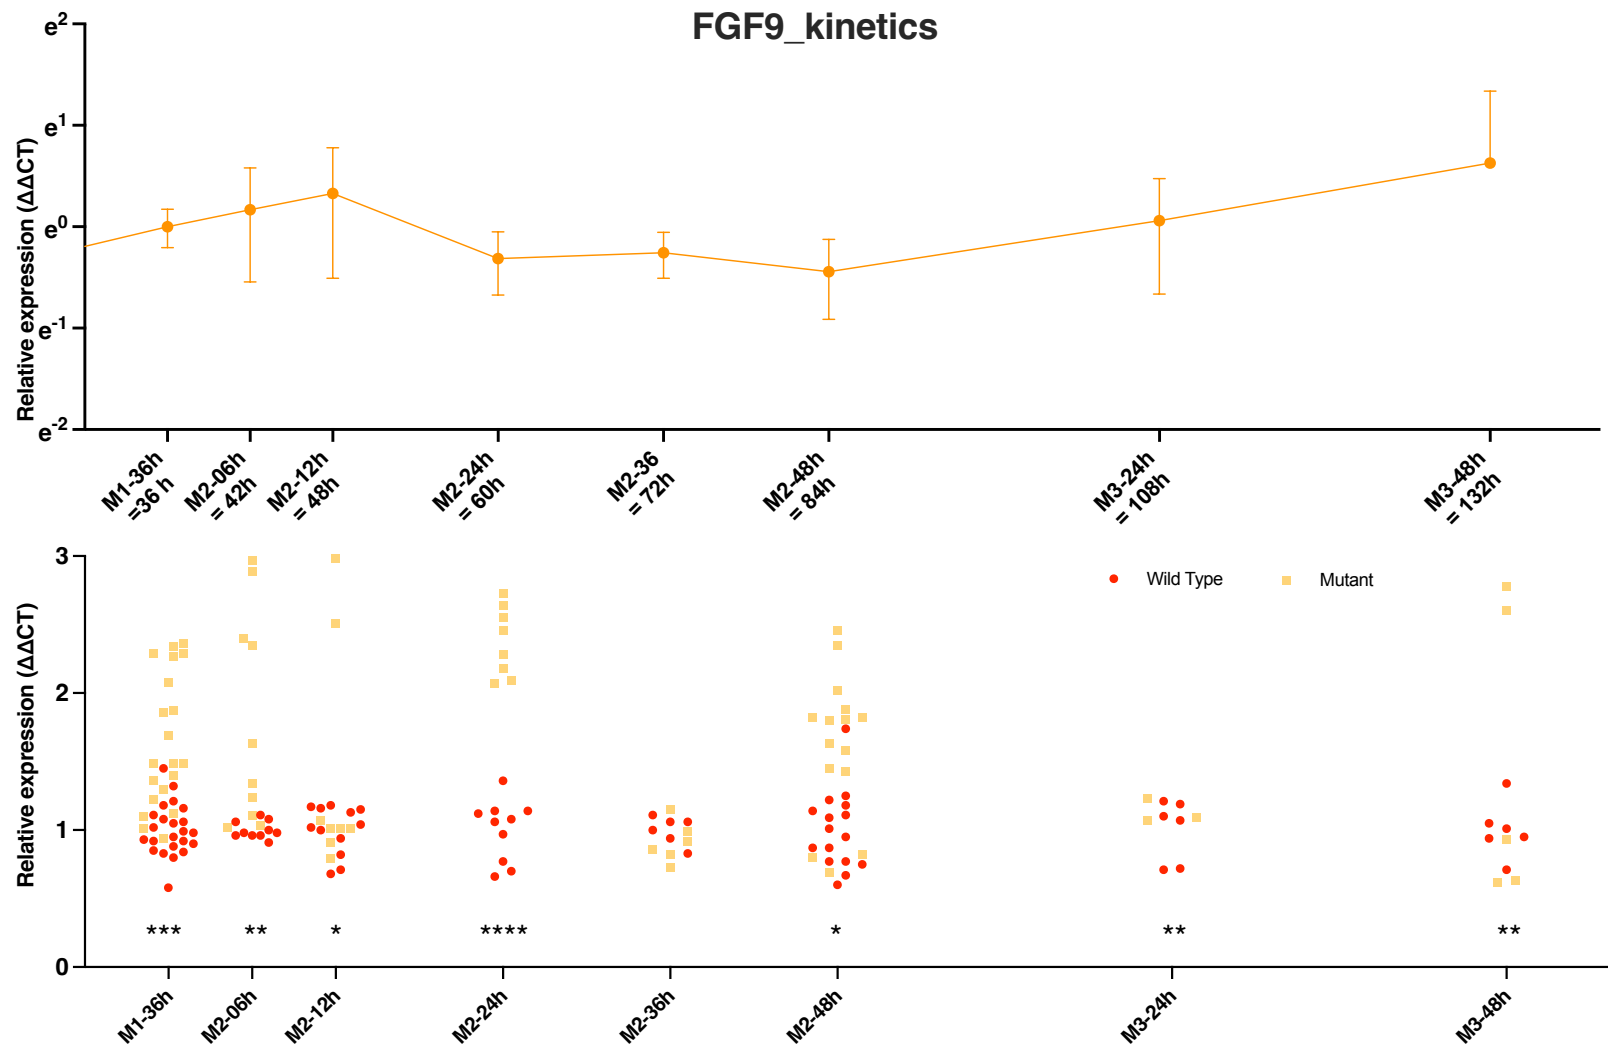

## Supplementary Figure 07

Supplementary to Figure 05

This PDF file is an export of data from Supplementary\_Data\_29.

Expression kinetics and comparison between Wild Type and Mutant for the *FOXL2* gene in rt-qPCR experiments.

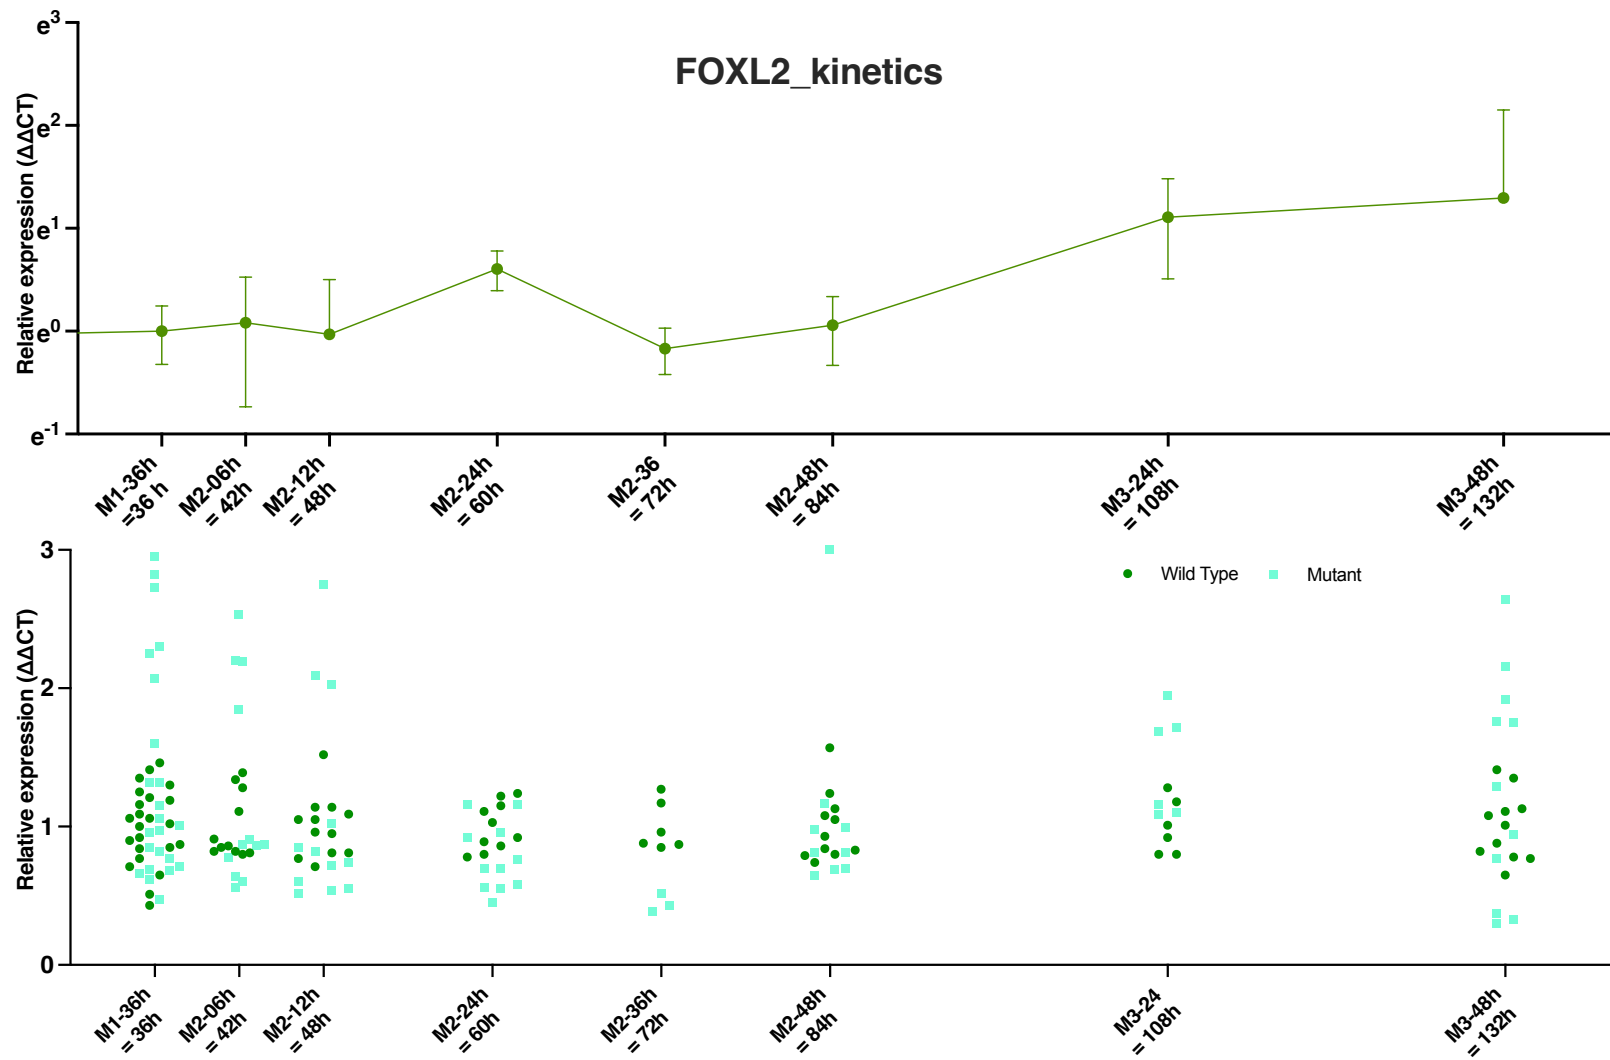

## Supplementary Figure 08

Supplementary to Figure 05

This PDF file is an export of data from Supplementary\_Data\_29.

Expression kinetics and comparison between Wild Type and Mutant for the *NR5A1* gene in rt-qPCR experiments.



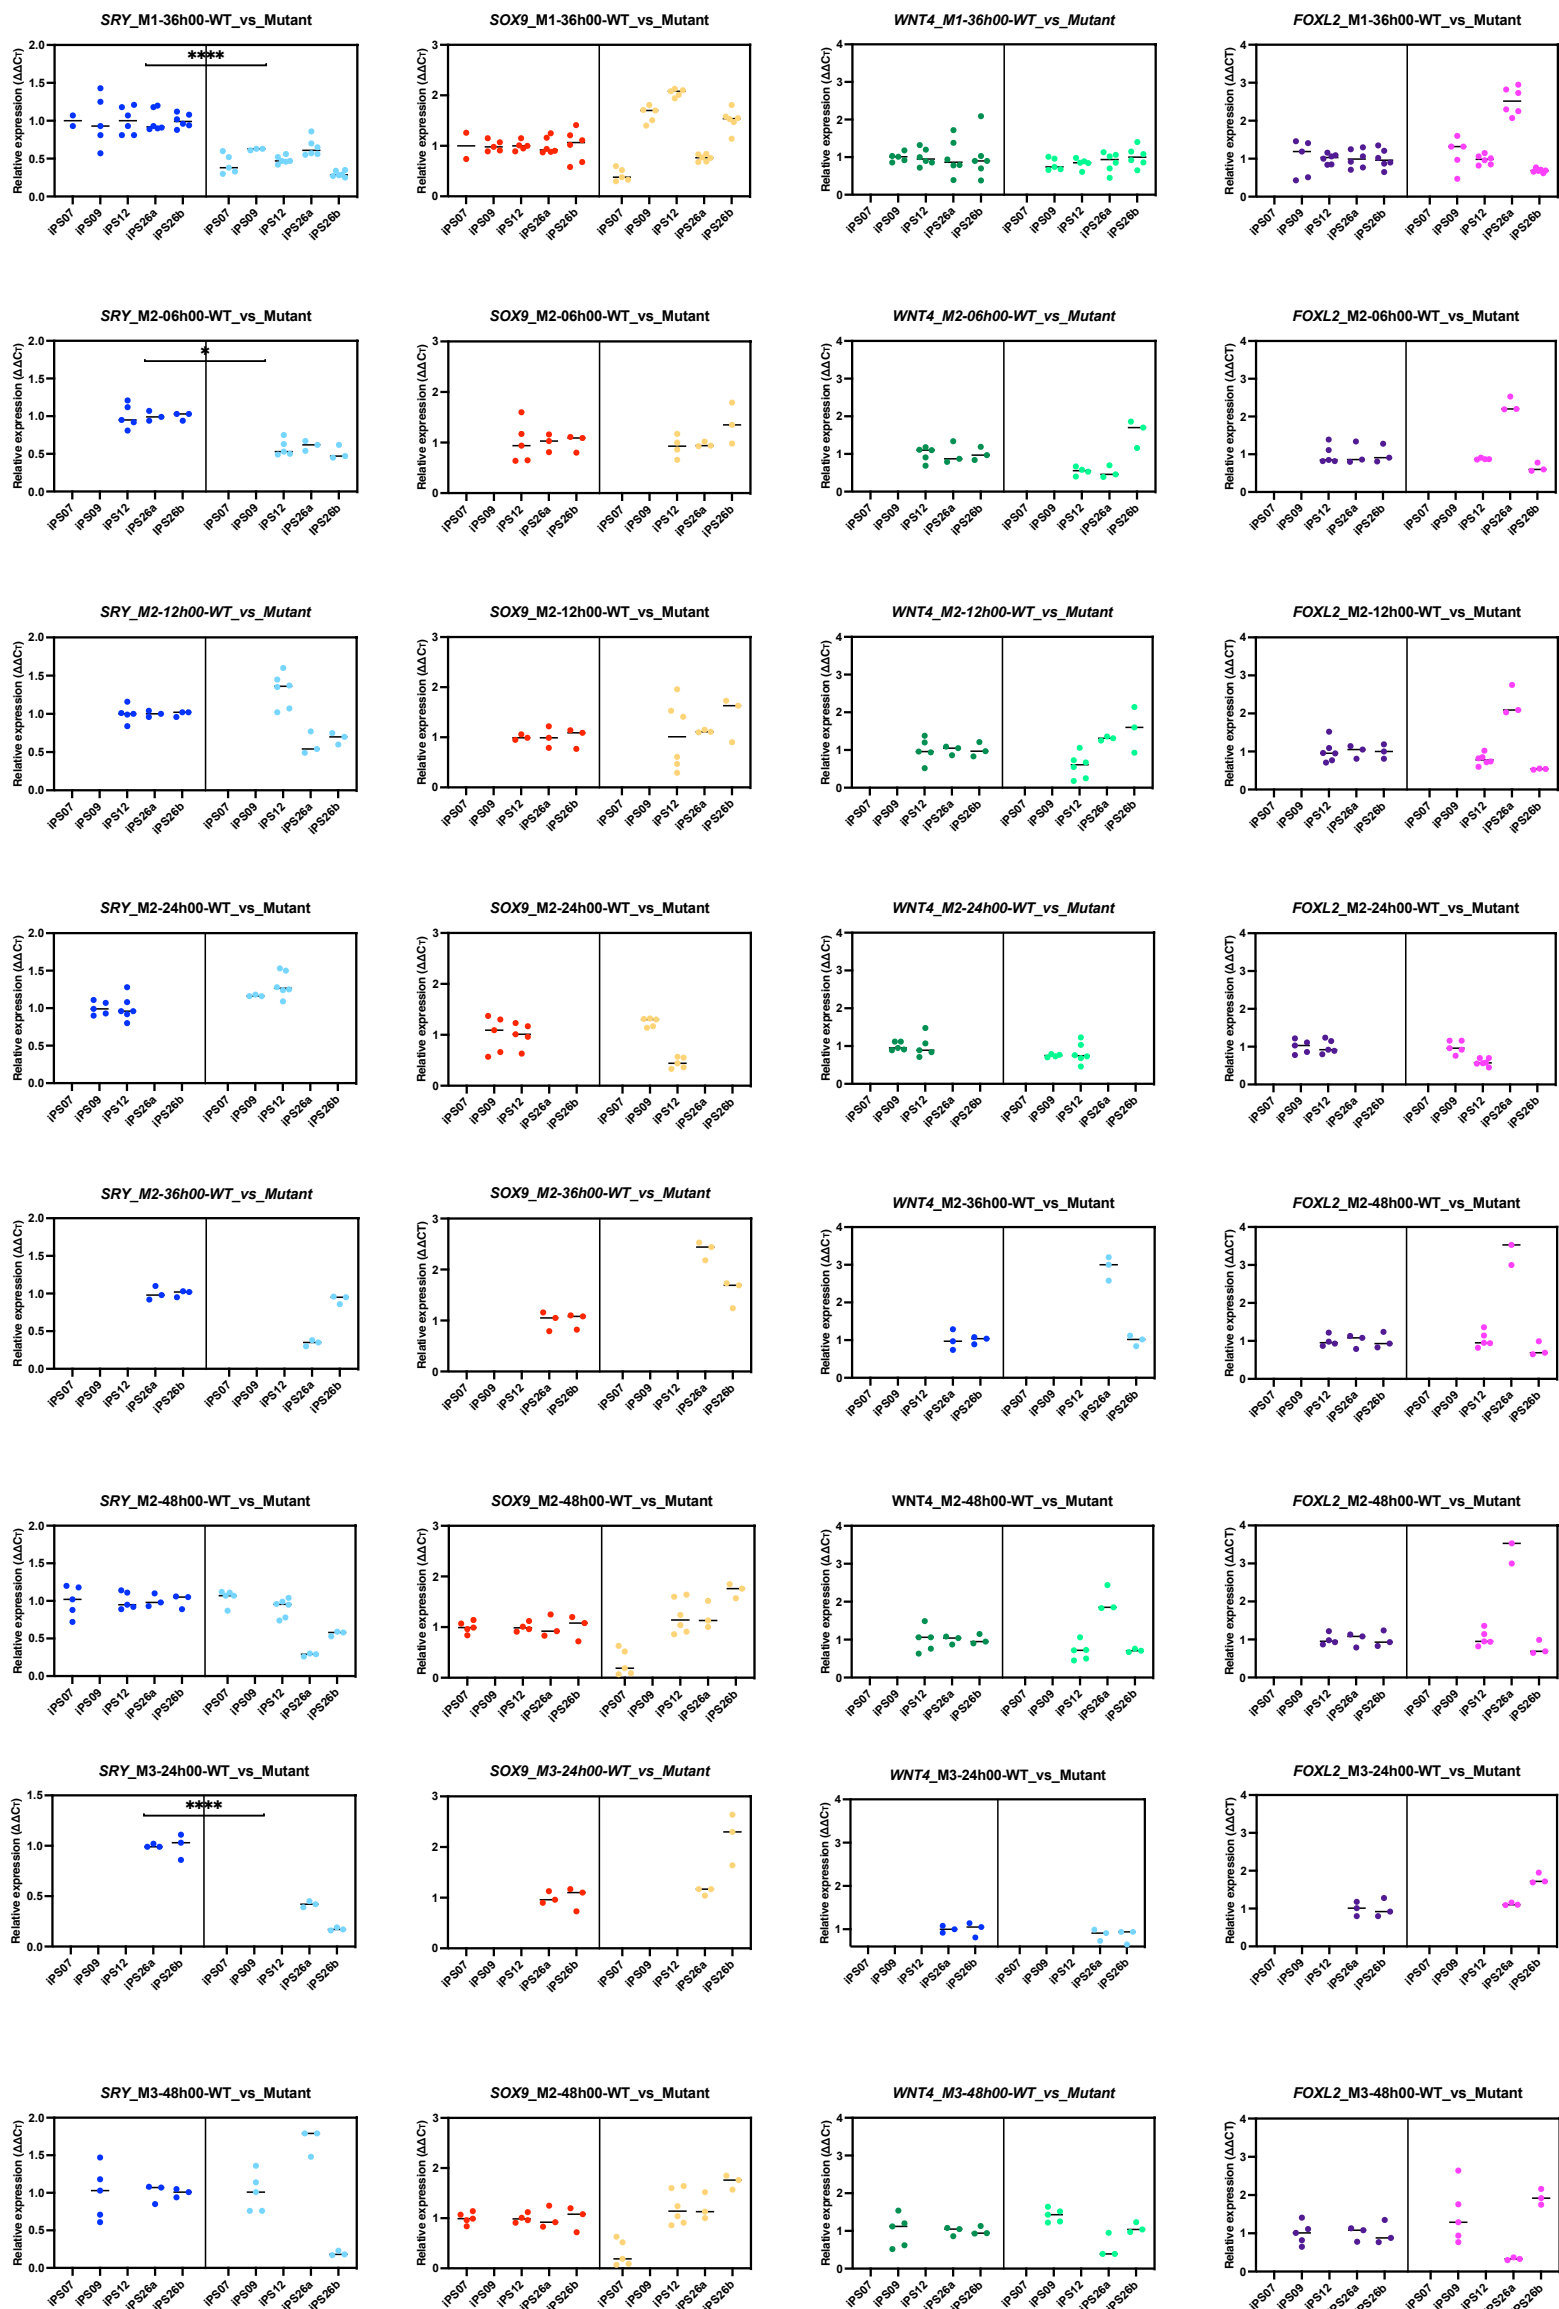

## Supplementary Figure 09

Supplementary to Figure 05

This PDF file is an export of data from Supplementary\_Data\_29.

A comprehensive file detailing the results of real-time quantitative PCR (rt-qPCR) experiments, comparing wild type and mutant samples, with detailed analysis provided for each experiment, gene (*SRY*, *SOX9*, *FGF9*, and *WNT4*), and timepoint.

## Supplementary Figure 10

Supplementary to Figure 05

Comparison between Wild Type and Mutant hiPSC lines. The expression levels of *NR5A1* and *FGF9* are detailed for each experiment and timepoint.

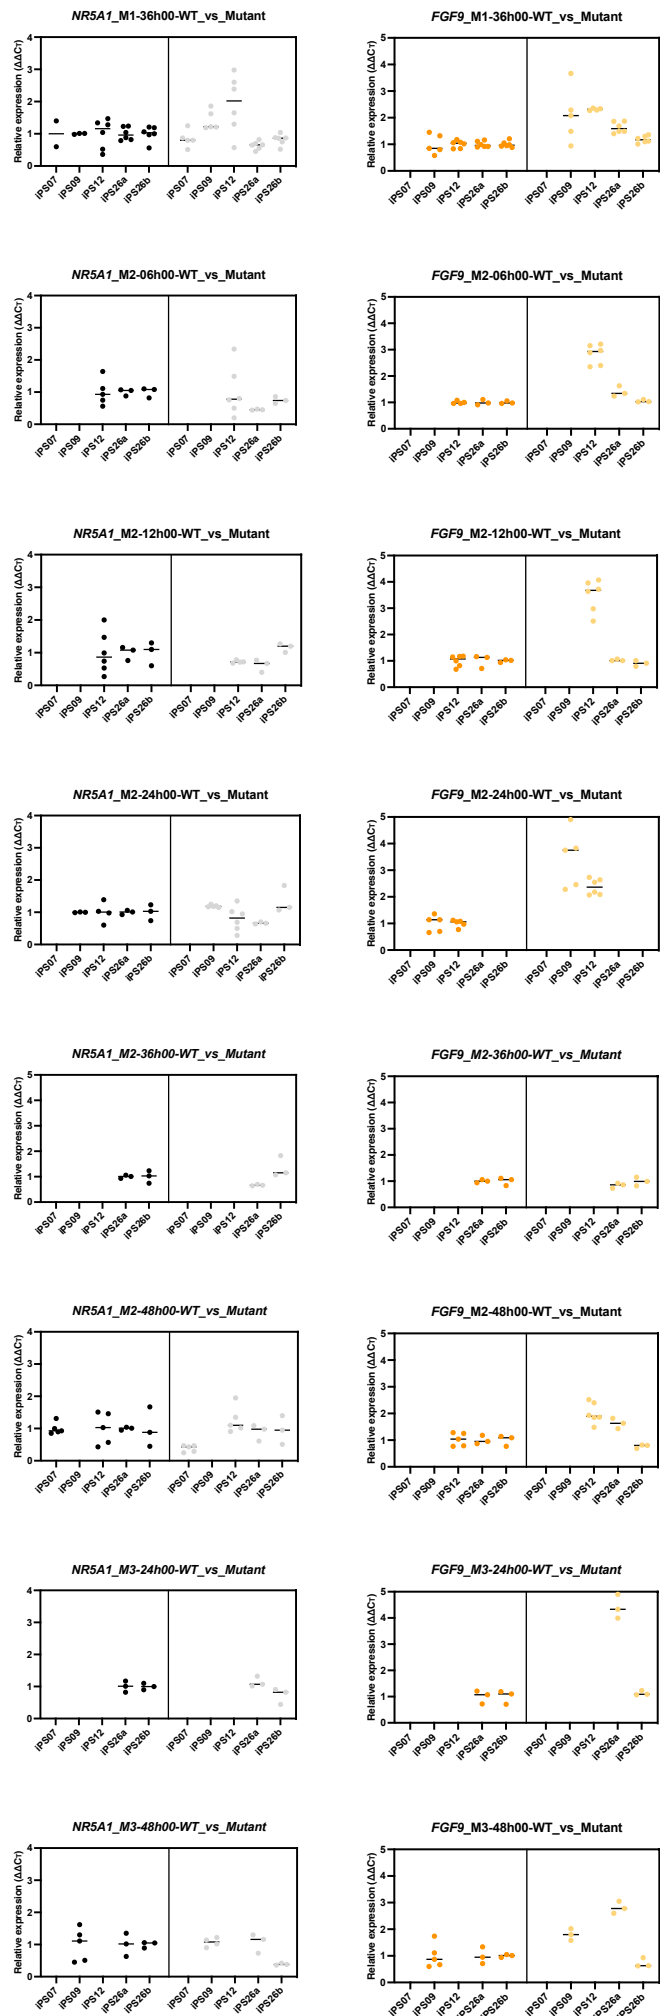

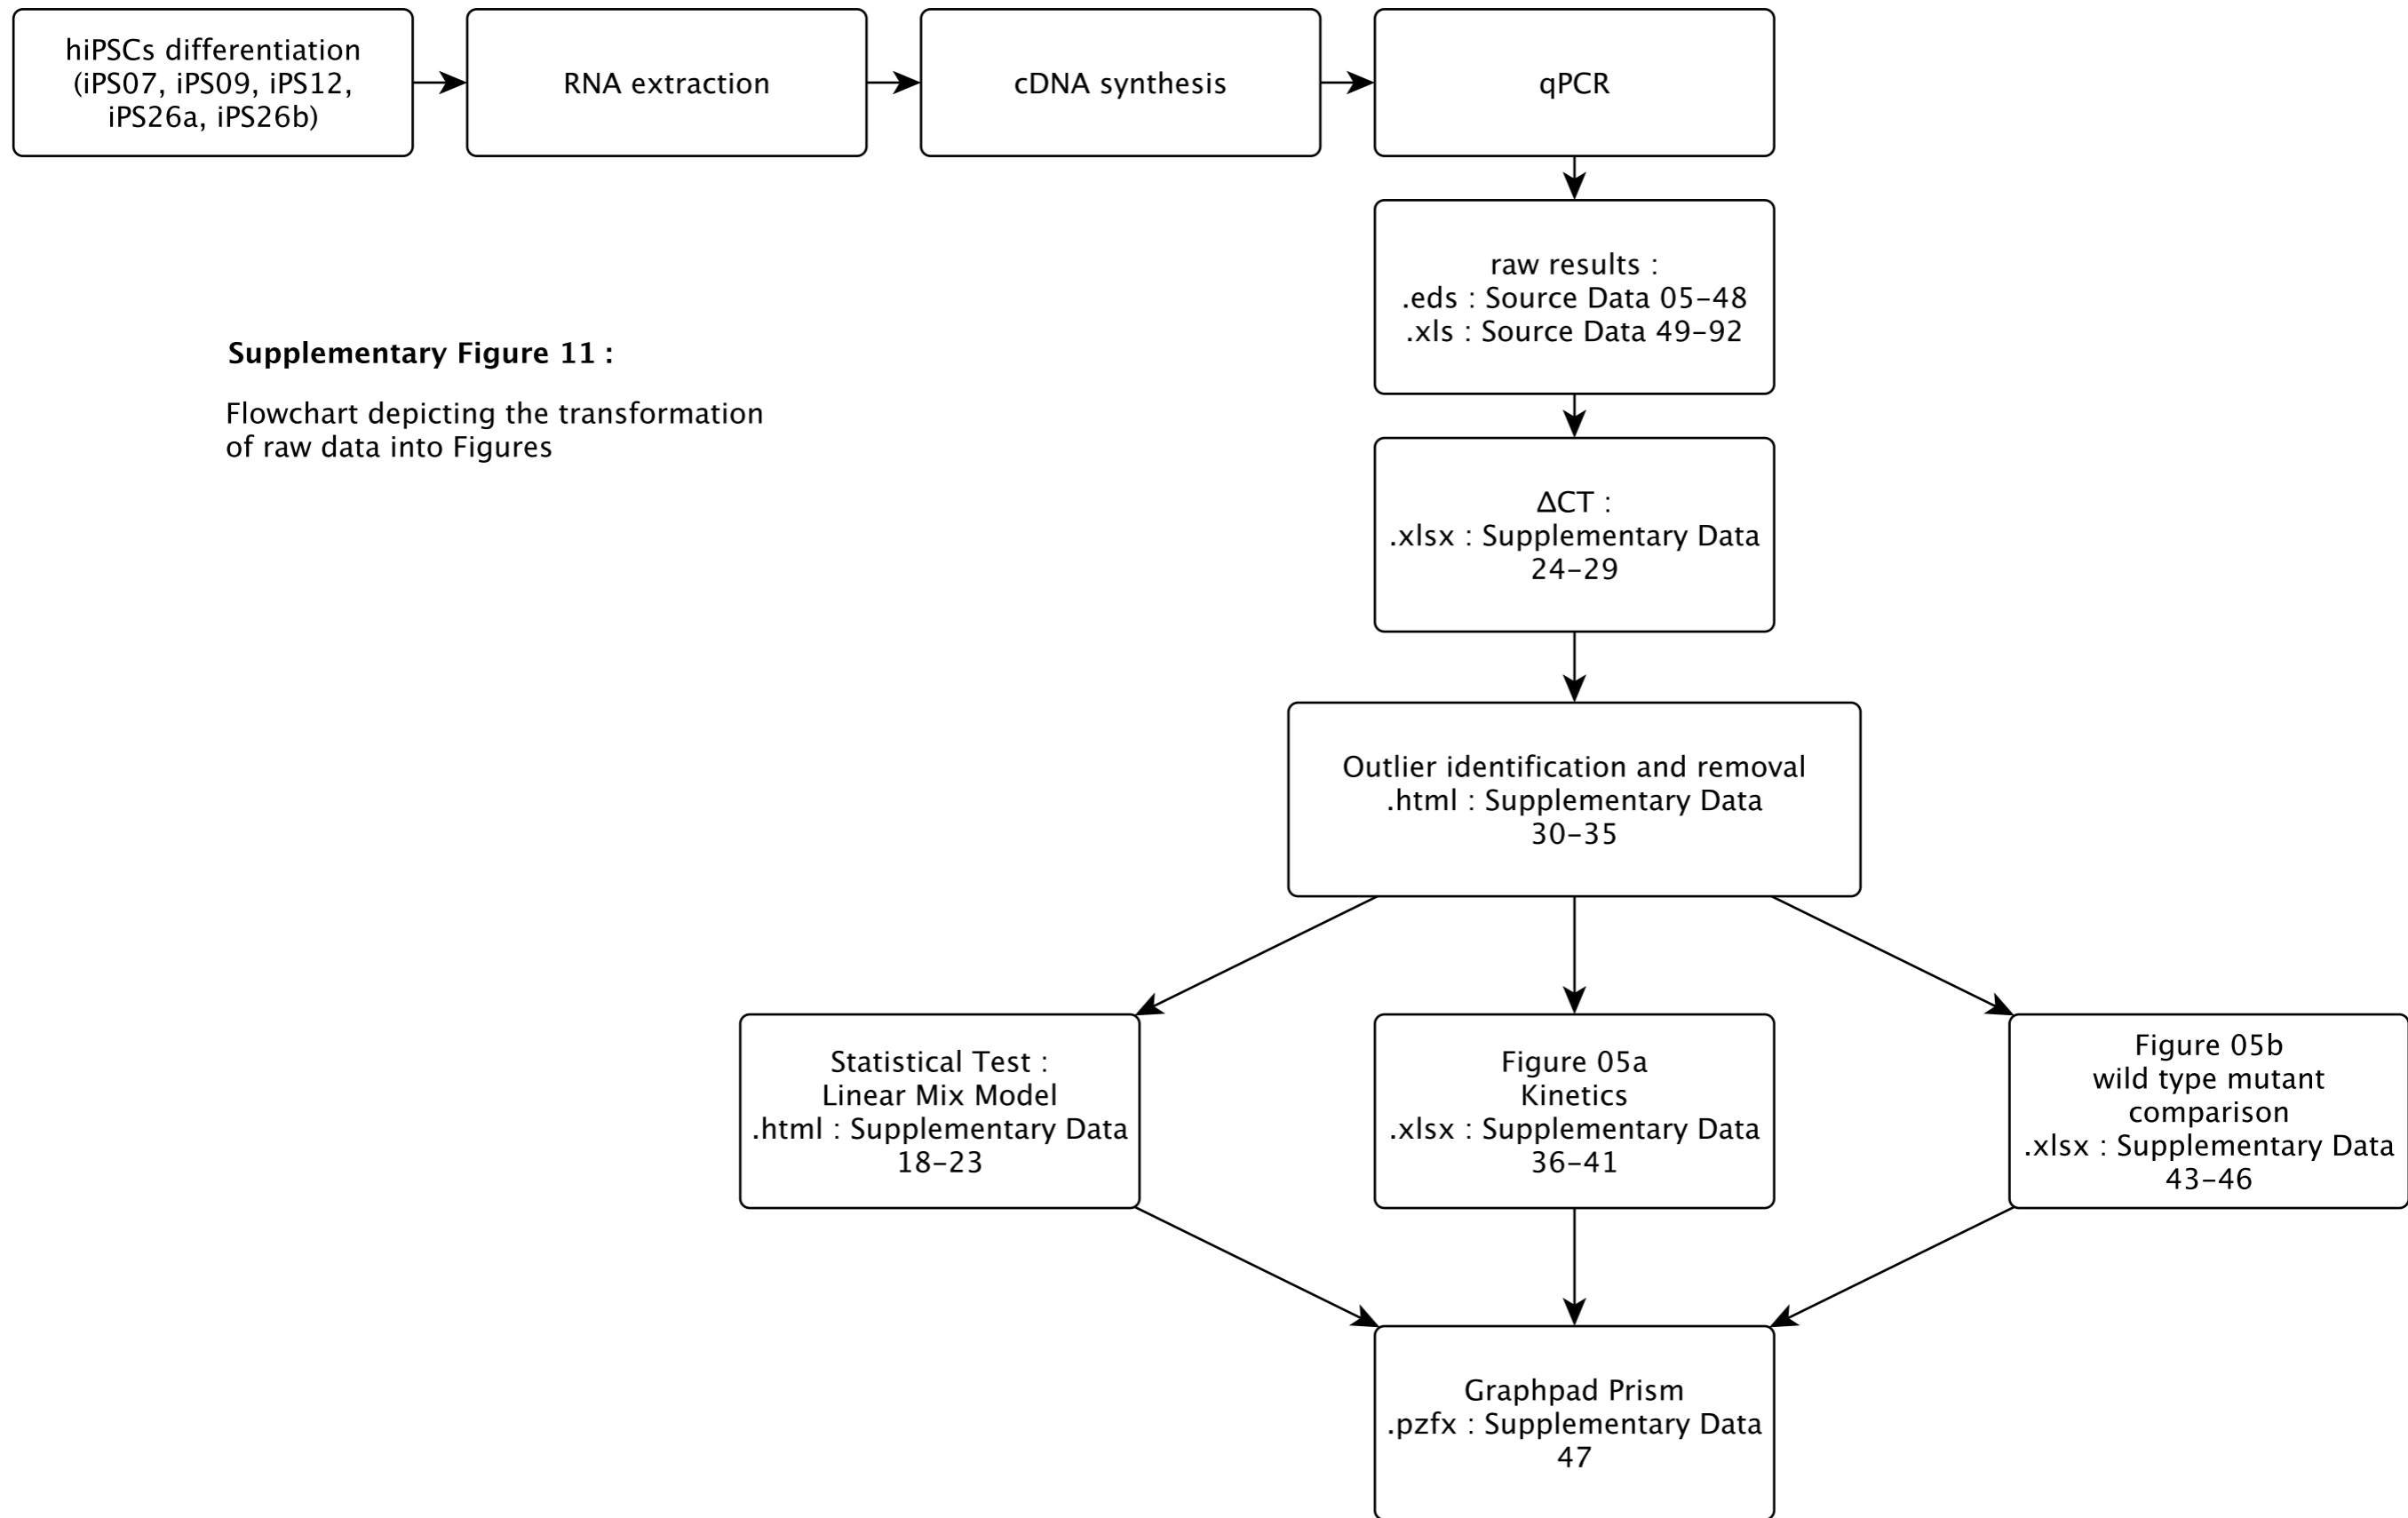

**Supplementary Figure 11 :**

Flowchart depicting the transformation  
of raw data into Figures

| Case              | Sex of rearing | Karyotype | Phenotype, External genitalia                                                        | Internal genitalia                 | Gonad histology                                                                                | Diagnosis                          |
|-------------------|----------------|-----------|--------------------------------------------------------------------------------------|------------------------------------|------------------------------------------------------------------------------------------------|------------------------------------|
| <b>Pedigree A</b> |                |           |                                                                                      |                                    |                                                                                                |                                    |
| V.12 (index)      | M              | 46,XY     | Gynaecomastia, micropenis, bilateral cryptorchidism                                  | Rudimentary uterus                 | R, ovarian-like stromal tissue with hyalinization and calcifications; L, seminoma/dysgerminoma | 46,XY gonadal dysgenesis           |
| V.16              | M              | 46,XY     | Ambiguous                                                                            | Uterus, bilateral fallopian tubes  | R, testis, hyalinated tubules, seminoma ; L ovarian-like stroma                                | 46,XY gonadal dysgenesis           |
| VI.3              | M              | 46,XY     | Ambiguous, empty labio-scrotal folds                                                 | Absent uterus, fallopian tube      | R, testis with ovarian-like stroma; L, streak gonad                                            | 46,XY gonadal dysgenesis           |
| VI.9              | M              | 46,XY     | Ambiguous, unilateral cryptorchidism, perineal hypospadias, separate vaginal orifice | Absent uterus, left fallopian tube | R, testis; L, ovarian-like stroma                                                              | 46,XY gonadal dysgenesis           |
| V.6               | F              | 46,XY     | Female, absence of menarche                                                          | -                                  | -                                                                                              | Suspected 46,XY gonadal dysgenesis |
| V.9               | F              | 46,XY     | Female, absence of menarche                                                          | -                                  | -                                                                                              | Suspected 46,XY gonadal dysgenesis |
| V.11              | F              | 46,XY     | Female, absence of menarche                                                          | -                                  | -                                                                                              | Suspected 46,XY gonadal dysgenesis |
| <b>Pedigree B</b> |                |           |                                                                                      |                                    |                                                                                                |                                    |
| V.1               | M              | 46,XY     | Ambiguous                                                                            | -                                  | R, testis with ovarian-like stroma; L, streak gonad                                            | 46,XY gonadal dysgenesis           |
| IV.1              | F              | 46,XY     | Female absence of menarche                                                           | -                                  | -                                                                                              | Suspected 46,XY gonadal dysgenesis |
| IV.2              | F              | 46,XY     | Female absence of menarche                                                           | -                                  | -                                                                                              | Suspected 46,XY gonadal dysgenesis |
| VI.1              | F              | 46,XY     | Female                                                                               | -                                  | Bilateral streak gonads with gonadoblastoma                                                    | 46,XY gonadal dysgenesis           |

### Supplementary\_Table\_01

Detailed clinical information for family members where available. The age at clinical presentation ranged from 6 to 23 years of age

## Supplementary Notes

|                                                                        |          |
|------------------------------------------------------------------------|----------|
| <b>I. FILE FORMAT.....</b>                                             | <b>3</b> |
| 1. .CLC FILES .....                                                    | 3        |
| 2. .CSV AND .XML FILES .....                                           | 3        |
| 3. .HTML FILES .....                                                   | 3        |
| 4. .XLS AND .XLSX FILES .....                                          | 3        |
| 5. .PDF FILES .....                                                    | 3        |
| 6. .EDS FILES .....                                                    | 3        |
| 7. .PZFX FILES .....                                                   | 4        |
| <b>II. SUPPLEMENTARY DATA .....</b>                                    | <b>4</b> |
| 1. FIGURE 01.....                                                      | 4        |
| <i>Supplementary_Data_01.clc</i> .....                                 | 4        |
| <i>Supplementary_Data_02.clc</i> .....                                 | 4        |
| 2. FIGURE 02.....                                                      | 4        |
| <i>Supplementary_Data_03.clc</i> .....                                 | 4        |
| <i>Supplementary_Data_04.clc</i> .....                                 | 5        |
| <i>Supplementary_Data_05.clc</i> .....                                 | 5        |
| <i>Supplementary_Data_06.xlsx</i> .....                                | 5        |
| <i>Supplementary_Data_07.xlsx</i> .....                                | 5        |
| 3. FIGURE 03.....                                                      | 5        |
| <i>Supplementary_Data_08.xlsx</i> .....                                | 5        |
| 4. FIGURE 04.....                                                      | 5        |
| <i>Supplementary_Data_09.clc</i> .....                                 | 5        |
| <i>Supplementary_Data_10.clc</i> .....                                 | 6        |
| <i>Supplementary_Data_11.clc</i> .....                                 | 6        |
| <i>Supplementary_Data_12.clc</i> .....                                 | 6        |
| <i>Supplementary_Data_13.clc</i> .....                                 | 6        |
| <i>Supplementary_Data_14.clc</i> .....                                 | 6        |
| <i>Supplementary_Data_15.html and Supplementary_Data_16.html</i> ..... | 6        |
| 5. FIGURE 05.....                                                      | 6        |
| <i>Supplementary_Data_17.html</i> .....                                | 7        |
| <i>Supplementary_Data_18.html to Supplementary_Data_23.html</i> .....  | 7        |
| <i>Supplementary_Data_24.xlsx to Supplementary_Data_29.xlsx</i> .....  | 8        |
| <i>Supplementary_Data_30.html to Supplementary_Data_35.html</i> .....  | 8        |
| <i>Supplementary_Data_36.xlsx to Supplementary_Data_41.xlsx</i> .....  | 8        |
| <i>Supplementary_Data_42.xlsx to Supplementary_Data_46.xlsx</i> .....  | 8        |
| <i>Supplementary_Data_47.pzfx</i> .....                                | 9        |

|                                                        |           |
|--------------------------------------------------------|-----------|
| <b>III. SOURCE DATA .....</b>                          | <b>10</b> |
| 1. FIGURE 04.....                                      | 10        |
| <i>Source_Data_01.csv and Source_Data_02.csv .....</i> | <i>10</i> |
| <i>Source_Data_03.xml and Source_Data_04.xml.....</i>  | <i>10</i> |
| 2. FIGURE 05.....                                      | 10        |
| <i>Source_Data_05.eds to Source_Data_91.xls .....</i>  | <i>10</i> |

# I. File format

## 1. .clc files

The sequences are provided as .clc files since they were annotated using the [CLC Main Workbench software \(CLC Main Workbench software\)](#).

The sequences and their annotations can be easily visualized using the [demo version of CLC main workbench](#)

This software does not require any specific bioinformatic skills and enables clear and precise annotation of the sequences.

## 2. .csv and .xml files

The Luciferase assay was performed using the [Promega Glomax apparatus](#), and the raw results were obtained in the form of .csv and .xml files.

## 3. .html files

Statistical analysis was conducted in [RStudio](#), and the scripts were rendered as HTML documents using R Markdown.

## 4. .xls and .xlsx files

.xls and .xlsx files are Microsoft Excel spreadsheets. These file formats are supported by most spreadsheet applications, including Excel, Apple Numbers, OpenOffice, LibreOffice Calc, and more.

## 5. .pdf files

The PDF format is now an open standard, maintained by the International Organization for Standardization (ISO). PDF files are widely used to create and share documents, as the PDF will keep formatting intact regardless of the viewer's operating system and software.

## 6. .eds files

The Quantitative PCR was performed using the a [StepOne Plus Real-Time PCR apparatus](#), and the raw results were obtained in the form of .eds and .xls files.

## 7. .pzfx files

.pzfx is the default format of [GraphPad Prism](#).

The files can be easily visualized using [Prism's viewer mode](#).

## II. Supplementary Data

### 1. Figure 01

[Supplementary Data 01.clc](#)

The DNA genomic sequences were downloaded from [NCBI](#).

The complete human genomic region and annotations were obtained from the [NC\\_000024 human contig](#).

Human annotated sequences from NC\_000024 used to build Fig 1A. The figure depicts an 80,413 bp sequence fragment (GRC38h38.p13-chrY: 2786855-2867268) spanning from the *SRY* gene to the RPSY4 gene.

The repeated sequences in the Y chromosome locus between *SRY* and RPS4Y1 were identified with [Repeat masker](#).

[Supplementary Data 02.clc](#)

A 7386bp sequence fragment (GRC38h38.p13-chrY: 2786855-2794240) from *SRY* to the beginning of the repetitive elements.

The predicted binding sites for GATA4, NR5A1, and WT1 were identified with the MatInspector module from the Genomatix suite Precigen Bioinformatics Germany GmbH (product discontinued).

### 2. Figure 02

[Supplementary Data 03.clc](#)

Annotated sequences for the *SRY* gene and its upstream sequences from 83 eutherian species were downloaded from [NCBI](#). Their accession number, common name and latin name are given in [Supplementary\\_Data\\_06.xlsx](#).

The sequences used to build Fig 2B were selected on two criteria: they were in close vicinity to *SRY* and they returned a hit in a blastn search against the human *SRY* with



default settings (Number of threads:8, mask low complexity regions, Expect: 10, Word size: 11, Match 2, Mismatch -3, gap costs: existence 5, extension 2). This association was considered to be a strong indicator of homology.

The annotated sequences are given as a CLC Main Workbench gene list.

[Supplementary Data 04.clc](#)

DNA fragments homologous to *SRY* and its upstream sequence have been identified by BLAST in the genome of the 83 mammalian species. These homologous DNA fragments were aligned on the 7046bp human sequence shown in Fig 1B and 2A using the ClustalW algorithm from CLC main workbench and subsequently hand edited.

[Supplementary Data 05.clc](#)

The 17 most relevant species were selected from Supplementary\_Data\_04, realigned using the ClustalW algorithm from CLC main workbench and subsequently hand edited.

[Supplementary Data 06.xlsx](#)

This file contains a comprehensive list of the accession numbers, common names, and Latin names of the sequences corresponding to the *SRY* gene and its upstream sequences from 83 eutherian species, downloaded from [NCBI](#).

[Supplementary Data 07.xlsx](#)

A list of the transcription factor binding sites predicted by MatInspector (<https://genomatix.de>) within the E250 enhancer

### **3. Figure 03**

[Supplementary Data 08.xlsx](#)

Polymorphisms in the genomic sequence of the Y chromosome that allowed the identification of the Variant-1 haplogroup.

### **4. Figure 04**

[Supplementary Data 09.clc](#)

The pcDNA3 vector was employed for expressing human NR5A1 in human cells. The protein is N-terminally tagged with two MYC epitopes.

#### [Supplementary Data 10.clc](#)

The [pCMV-Renilla](#) (#AF025843) vector was employed to express the Renilla luciferase gene. This gene served as a reference gene for normalizing gene expression in transiently transfected HEK293T and HeLa cells.

#### [Supplementary Data 11.clc](#)

Luciferase expression was achieved using the [pGL4.26](#) vector, with a minimal promoter controlling its transcription. To assess its enhancer activity, the reference variant of E250 was cloned upstream of the minimal promoter.

#### [Supplementary Data 12.clc](#)

Luciferase expression was achieved using the [pGL4.26](#) vector, with a minimal promoter controlling its transcription. To assess its enhancer activity, the Variant-1 of E250 was cloned upstream of the minimal promoter.

#### [Supplementary Data 13.clc](#)

Luciferase expression was achieved using the [pGL4.26](#) vector, with a minimal promoter controlling its transcription. To assess its enhancer activity, the Variant-2 of E250 was cloned upstream of the minimal promoter.

#### [Supplementary Data 14.clc](#)

Luciferase expression was achieved using the [pGL4.26](#) vector, with a minimal promoter controlling its transcription. To assess its enhancer activity, a modified version of E250 was generated by introducing substitutions in the NR5A1-binding site, rendering it unrecognizable. This modified E250 variant was then cloned upstream of the minimal promoter.

#### [Supplementary Data 15.html](#) and [Supplementary Data 16.html](#)

Statistical analysis for the Luciferase assay performed on HEK293T (Supplementary\_Data\_15) and HeLa (Supplementary\_Data\_16) cells.

## **5. Figure 05**

Gene expression was determined using real time quantitative Polymerase Chain Reaction (qPCR).

The  $\Delta$ CT analysis of qPCRs were performed as described in [this video](#).

The results regarding the expression of several differentiation associated markers *SRY*, *SOX9*, *WNT4*, *NR5A1*, *FOXL2*, *FGF9*, *AMH* during the differentiation of hiPSCs into gonadal-like cells are as follows:

- Five differentiation experiments were conducted, namely iPS07, iPS09, iPS12, iPS26a, and iPS26b.
- Undifferentiated hiPSCs were obtained from two experiments: iPS07, and iPS19.
- Comparisons were performed between wild-type and mutant cell lines. RPL19 was utilized as the normalizer.
- The outliers were identified using the InterQuartile Range (IQR) method on the  $\Delta$ CT values (dCT column). The outlier values were subsequently replaced with "NA" in the dCT\_NA column. For more detailed information on the outlier detection process, refer to [Supplementary\\_Data\\_17.html](#) to [Supplementary\\_Data\\_22.html](#).
- A linear mixed model (LMM) including the genotype, the time and their interaction as fixed effects and the experiment as random effect was fitted to investigate significant differences in the  $\Delta$ CT values between wild type and mutant cells, allowing for a comprehensive examination of gene expression dynamics over time ([Supplementary\\_Data\\_23.html](#) to [Supplementary\\_Data\\_28.html](#)).
- Due to the intricate nature of the system, a substantial experimental effect was evidenced by the statistical test employed. Consequently, the results deemed statistically significant exhibit a high level of robustness.

[Supplementary Data 17.html](#)

An Excel spreadsheet has been created to provide a detailed computation of  $\Delta\Delta$ CT for comparing the expression levels of AMH between Wild Type and Mutant cell lines.

[Supplementary Data 18.html](#) to [Supplementary Data 23.html](#)

The Rmarkdown script describing the analysis of the real time qPCR utilizing a linear mixed model.

[Supplementary\\_Data\\_24](#) (*SRY*), [Supplementary\\_Data\\_25](#) (*SOX9*),  
[Supplementary\\_Data\\_26](#) (*WNT4*), [Supplementary\\_Data\\_27](#) (*NR5A1*),  
[Supplementary\\_Data\\_28](#) (*FOXL2*), [Supplementary\\_Data\\_29](#) (*FGF9*)

[Supplementary Data 24.xlsx to Supplementary Data 29.xlsx](#)

Excel spreadsheets have been created to provide a detailed computation of  $\Delta CT$  used in Supplementary\_Data\_18.html to Supplementary\_Data\_23.html.

Supplementary\_Data\_42 (*SRY*), Supplementary\_Data\_43 (*SOX9*),  
Supplementary\_Data\_44 (*WNT4*), Supplementary\_Data\_45 (*NR5A1*),  
Supplementary\_Data\_46 (*FOXL2*), Supplementary\_Data\_47 (*FGF9*)

[Supplementary Data 30.html to Supplementary Data 35.html](#)

The outliers for the *SRY*, *SOX9*, *WNT4*, *NR5A1*, *FOXL2*, *FGF9*, *AMH* qPCRs were identified using the InterQuartile Range (IQR) method and subsequently excluded (R version 4.3.0 and RStudio version 2023.06.0+421).

Supplementary\_Data\_30 (*SRY*), Supplementary\_Data\_31 (*SOX9*),  
Supplementary\_Data\_32 (*WNT4*), Supplementary\_Data\_33 (*NR5A1*),  
Supplementary\_Data\_34 (*FOXL2*), Supplementary\_Data\_35 (*FGF9*)

[Supplementary Data 36.xlsx to Supplementary Data 41.xlsx](#)

Excel spreadsheets have been created to provide a detailed computation of  $\Delta\Delta CT$  for comparing the expression levels of the following genes between Wild Type and Mutant cell lines : *SRY*, *SOX9*, *WNT4*, *NR5A1*, *FOXL2*, *FGF9*

The Wild Type condition was used as the calibrator.

Supplementary\_Data\_36 (*SRY*), Supplementary\_Data\_37 (*SOX9*),  
Supplementary\_Data\_38 (*WNT4*), Supplementary\_Data\_39 (*NR5A1*),  
Supplementary\_Data\_40 (*FOXL2*), Supplementary\_Data\_41 (*FGF9*),  
Supplementary\_Data\_42 (*AMH*)

[Supplementary Data 42.xlsx to Supplementary Data 46.xlsx](#)

Excel spreadsheets have been created to provide a detailed computation of  $\Delta\Delta CT$ , establishing the expression kinetics of the following genes in Wild Type cell lines : *SRY*, *SOX9*, *WNT4*, *NR5A1*, *FOXL2*, *FGF9*, and *AMH*.

The procedure used was the same as described in Supplementary\_Data\_36.xlsx to Supplementary\_Data\_41.xlsx with the exception that M1-36h00 was used as the calibrator.

Supplementary\_Data\_42 (iPS07), Supplementary\_Data\_43 (iPS09),  
Supplementary\_Data\_44 (iPS12), Supplementary\_Data\_45 (iPS26a),  
Supplementary\_Data\_46 (iPS26b)

[Supplementary Data 47.pzfx](#)

Figure 05 was created using GraphPad Prism version 10.1.1 (270). This file compiles data from Supplementary\_Data\_30.xlsx to Supplementary\_Data\_36.xlsx.

### III. Source Data

#### 1. Figure 04

[Source\\_Data\\_01.csv and Source\\_Data\\_02.csv](#)

Raw results of the Luciferase assay performed on HEK293T (Source\_Data\_01.csv) and HeLa cells (Source\_Data\_02.csv).

[Source\\_Data\\_03.xml and Source\\_Data\\_04.xml](#)

Raw results of the Luciferase assay performed on HEK293T (Source\_Data\_01.xml) and HeLa cells (Source\_Data\_02.xml).

#### 2. Figure 05

[Source\\_Data\\_05.eds to Source\\_Data\\_91.xls](#)

Raw results of RT-qPCRs performed on RNA extracted from differentiated hiPSC (human induced Pluripotent Stem Cells). Both the .eds (Source\_Data\_05.eds to Source\_Data\_48.eds) and .xls (Source\_Data\_49.xls to Source\_Data\_91.xls) files are provided.

| Figure | File format | Type        | Name               | Description                                                     |
|--------|-------------|-------------|--------------------|-----------------------------------------------------------------|
| Fig04  | csv         | Source Data | Source_Data_01.csv | Luciferase experiment - Glomax raw data - HEK2937 cells         |
| Fig04  | csv         | Source Data | Source_Data_02.csv | Luciferase experiment - Glomax raw data - HeLa cells            |
| Fig04  | xml         | Source Data | Source_Data_03.xml | Luciferase experiment - Glomax raw data - HEK2937 cells         |
| Fig04  | xml         | Source Data | Source_Data_04.xml | Luciferase experiment - Glomax raw data - HeLa cells            |
| Fig05  | eds         | Source Data | Source_Data_05.eds | qPCR experiment - StepOne Plus Real-Time PCR raw data - qPCR35  |
| Fig05  | eds         | Source Data | Source_Data_06.eds | qPCR experiment - StepOne Plus Real-Time PCR raw data - qPCR36  |
| Fig05  | eds         | Source Data | Source_Data_07.eds | qPCR experiment - StepOne Plus Real-Time PCR raw data - qPCR38  |
| Fig05  | eds         | Source Data | Source_Data_08.eds | qPCR experiment - StepOne Plus Real-Time PCR raw data - qPCR39  |
| Fig05  | eds         | Source Data | Source_Data_09.eds | qPCR experiment - StepOne Plus Real-Time PCR raw data - qPCR40  |
| Fig05  | eds         | Source Data | Source_Data_10.eds | qPCR experiment - StepOne Plus Real-Time PCR raw data - qPCR65  |
| Fig05  | eds         | Source Data | Source_Data_11.eds | qPCR experiment - StepOne Plus Real-Time PCR raw data - qPCR66  |
| Fig05  | eds         | Source Data | Source_Data_12.eds | qPCR experiment - StepOne Plus Real-Time PCR raw data - qPCR67  |
| Fig05  | eds         | Source Data | Source_Data_13.eds | qPCR experiment - StepOne Plus Real-Time PCR raw data - qPCR68  |
| Fig05  | eds         | Source Data | Source_Data_14.eds | qPCR experiment - StepOne Plus Real-Time PCR raw data - qPCR69  |
| Fig05  | eds         | Source Data | Source_Data_15.eds | qPCR experiment - StepOne Plus Real-Time PCR raw data - qPCR70  |
| Fig05  | eds         | Source Data | Source_Data_16.eds | qPCR experiment - StepOne Plus Real-Time PCR raw data - qPCR71  |
| Fig05  | eds         | Source Data | Source_Data_17.eds | qPCR experiment - StepOne Plus Real-Time PCR raw data - qPCR72  |
| Fig05  | eds         | Source Data | Source_Data_18.eds | qPCR experiment - StepOne Plus Real-Time PCR raw data - qPCR73  |
| Fig05  | eds         | Source Data | Source_Data_19.eds | qPCR experiment - StepOne Plus Real-Time PCR raw data - qPCR74  |
| Fig05  | eds         | Source Data | Source_Data_20.eds | qPCR experiment - StepOne Plus Real-Time PCR raw data - qPCR79  |
| Fig05  | eds         | Source Data | Source_Data_21.eds | qPCR experiment - StepOne Plus Real-Time PCR raw data - qPCR80  |
| Fig05  | eds         | Source Data | Source_Data_22.eds | qPCR experiment - StepOne Plus Real-Time PCR raw data - qPCR81  |
| Fig05  | eds         | Source Data | Source_Data_23.eds | qPCR experiment - StepOne Plus Real-Time PCR raw data - qPCR85  |
| Fig05  | eds         | Source Data | Source_Data_24.eds | qPCR experiment - StepOne Plus Real-Time PCR raw data - qPCR86  |
| Fig05  | eds         | Source Data | Source_Data_25.eds | qPCR experiment - StepOne Plus Real-Time PCR raw data - qPCR106 |
| Fig05  | eds         | Source Data | Source_Data_26.eds | qPCR experiment - StepOne Plus Real-Time PCR raw data - qPCR107 |
| Fig05  | eds         | Source Data | Source_Data_27.eds | qPCR experiment - StepOne Plus Real-Time PCR raw data - qPCR115 |
| Fig05  | eds         | Source Data | Source_Data_28.eds | qPCR experiment - StepOne Plus Real-Time PCR raw data - qPCR116 |
| Fig05  | eds         | Source Data | Source_Data_29.eds | qPCR experiment - StepOne Plus Real-Time PCR raw data - qPCR132 |
| Fig05  | eds         | Source Data | Source_Data_30.eds | qPCR experiment - StepOne Plus Real-Time PCR raw data - qPCR133 |
| Fig05  | eds         | Source Data | Source_Data_31.eds | qPCR experiment - StepOne Plus Real-Time PCR raw data - qPCR134 |
| Fig05  | eds         | Source Data | Source_Data_32.eds | qPCR experiment - StepOne Plus Real-Time PCR raw data - qPCR135 |
| Fig05  | eds         | Source Data | Source_Data_33.eds | qPCR experiment - StepOne Plus Real-Time PCR raw data - qPCR136 |
| Fig05  | eds         | Source Data | Source_Data_34.eds | qPCR experiment - StepOne Plus Real-Time PCR raw data - qPCR137 |
| Fig05  | eds         | Source Data | Source_Data_35.eds | qPCR experiment - StepOne Plus Real-Time PCR raw data - qPCR138 |
| Fig05  | eds         | Source Data | Source_Data_36.eds | qPCR experiment - StepOne Plus Real-Time PCR raw data - qPCR139 |





|        |      |                    |                            |                                                                                                     |
|--------|------|--------------------|----------------------------|-----------------------------------------------------------------------------------------------------|
| Fig05  | xls  | Source Data        | Source_Data_75.xls         | qPCR experiment - StepOne Plus Real-Time PCR raw data - qPCR134                                     |
| Fig05  | xls  | Source Data        | Source_Data_76.xls         | qPCR experiment - StepOne Plus Real-Time PCR raw data - qPCR135                                     |
| Fig05  | xls  | Source Data        | Source_Data_77.xls         | qPCR experiment - StepOne Plus Real-Time PCR raw data - qPCR136                                     |
| Fig05  | xls  | Source Data        | Source_Data_78.xls         | qPCR experiment - StepOne Plus Real-Time PCR raw data - qPCR137                                     |
| Fig05  | xls  | Source Data        | Source_Data_79.xls         | qPCR experiment - StepOne Plus Real-Time PCR raw data - qPCR138                                     |
| Fig05  | xls  | Source Data        | Source_Data_80.xls         | qPCR experiment - StepOne Plus Real-Time PCR raw data - qPCR139                                     |
| Fig05  | xls  | Source Data        | Source_Data_81.xls         | qPCR experiment - StepOne Plus Real-Time PCR raw data - qPCR142                                     |
| Fig05  | xls  | Source Data        | Source_Data_82.xls         | qPCR experiment - StepOne Plus Real-Time PCR raw data - qPCR140                                     |
| Fig05  | xls  | Source Data        | Source_Data_83.xls         | qPCR experiment - StepOne Plus Real-Time PCR raw data - qPCR141                                     |
| Fig05  | xls  | Source Data        | Source_Data_84.xls         | qPCR experiment - StepOne Plus Real-Time PCR raw data - qPCR143                                     |
| Fig05  | xls  | Source Data        | Source_Data_85.xls         | qPCR experiment - StepOne Plus Real-Time PCR raw data - qPCR144                                     |
| Fig05  | xls  | Source Data        | Source_Data_86.xls         | qPCR experiment - StepOne Plus Real-Time PCR raw data - qPCR151                                     |
| Fig05  | xls  | Source Data        | Source_Data_87.xls         | qPCR experiment - StepOne Plus Real-Time PCR raw data - qPCR149                                     |
| Fig05  | xls  | Source Data        | Source_Data_88.xls         | qPCR experiment - StepOne Plus Real-Time PCR raw data - qPCR145                                     |
| Fig05  | xls  | Source Data        | Source_Data_89.xls         | qPCR experiment - StepOne Plus Real-Time PCR raw data - qPCR146                                     |
| Fig05  | xls  | Source Data        | Source_Data_90.xls         | qPCR experiment - StepOne Plus Real-Time PCR raw data - qPCR147                                     |
| Fig05  | xls  | Source Data        | Source_Data_91.xls         | qPCR experiment - StepOne Plus Real-Time PCR raw data - qPCR148                                     |
| Fig05  | xls  | Source Data        | Source_Data_92.xls         | qPCR experiment - StepOne Plus Real-Time PCR raw data - qPCR150                                     |
| Fig01A | clc  | Supplementary Data | Supplementary_Data_01.clc  | annotated SRY locus - CLC main workbench file - <i>SRY</i> - Complete locus                         |
| Fig01B | clc  | Supplementary Data | Supplementary_Data_02.clc  | annotated SRY locus - CLC main workbench file - <i>SRY</i> - 7386bp sequence fragment               |
| Fig02B | clc  | Supplementary Data | Supplementary_Data_03.clc  | annotated SRY locus - CLC main workbench file - <i>SRY</i> - 83 species sequence list               |
| Fig02B | clc  | Supplementary Data | Supplementary_Data_04.clc  | annotated SRY locus - CLC main workbench file - <i>SRY</i> - 83 species sequence alignment          |
| Fig02B | clc  | Supplementary Data | Supplementary_Data_05.clc  | annotated SRY locus - CLC main workbench file - <i>SRY</i> - 17 species sequence alignment          |
| Fig02B | xlsx | Supplementary Data | Supplementary_Data_06.xlsx | List of the mammalian species used in this study                                                    |
| Fig02B | xlsx | Supplementary Data | Supplementary_Data_07.xlsx | Genomatix predicted transcription binding sites in the E250 enhancer                                |
| Fig03  | xlsx | Supplementary Data | Supplementary_Data_08.xlsx | H1a1 haplogroup                                                                                     |
| Fig04E | clc  | Supplementary Data | Supplementary_Data_09.clc  | Luciferase: annotated Plasmid-pcDNA3-Myc2X-NR5A1 - CLC main workbench file                          |
| Fig04E | clc  | Supplementary Data | Supplementary_Data_10.clc  | Luciferase: annotated Plasmid-pCMV-Renilla-AF025843 - CLC main workbench file                       |
| Fig04E | clc  | Supplementary Data | Supplementary_Data_11.clc  | Luciferase: annotated Plasmid-pGL4.26_link5_E250-Reference - CLC main workbench file                |
| Fig04E | clc  | Supplementary Data | Supplementary_Data_12.clc  | Luciferase: annotated Plasmid-pGL4.26_link5_pGL4.26_link5_E250-Variant-1<br>CLC main workbench file |
| Fig04E | clc  | Supplementary Data | Supplementary_Data_13.clc  | Luciferase: annotated Plasmid-pGL4.26_link5_pGL4.26_link5_E250-Variant-2<br>CLC main workbench file |
| Fig04E | clc  | Supplementary Data | Supplementary_Data_14.clc  | Luciferase: annotated Plasmid-pGL4.26_link5_E250-ΔNR5A1 - CLC main workbench file                   |
| Fig04  | html | Supplementary Data | Supplementary_Data_15.html | Luciferase on HEK293T cells - statistical analysis in R                                             |
| Fig04  | html | Supplementary Data | Supplementary_Data_16.html | Luciferase on HeLa cells - statistical analysis in R                                                |
| Fig05B | xlsx | Supplementary Data | Supplementary_Data_17.xlsx | RT-qPCR analysis - AMH - Wild type versus mutant comparison                                         |
| Fig05B | html | Supplementary Data | Supplementary_Data_18.html | RT-qPCR analysis - <i>SRY</i> - Linear Mixed Model in R                                             |

|        |      |                      |                             |                                                                                                                                                                                                                              |
|--------|------|----------------------|-----------------------------|------------------------------------------------------------------------------------------------------------------------------------------------------------------------------------------------------------------------------|
| Fig05B | html | Supplementary Data   | Supplementary_Data_19.html  | RT-qPCR analysis - SOX9 - Linear Mixed Model in R                                                                                                                                                                            |
| Fig05B | html | Supplementary Data   | Supplementary_Data_20.html  | RT-qPCR analysis - WNT4 - Linear Mixed Model in R                                                                                                                                                                            |
| Fig05B | html | Supplementary Data   | Supplementary_Data_21.html  | RT-qPCR analysis - NR5A1 - Linear Mixed Model in R                                                                                                                                                                           |
| Fig05B | html | Supplementary Data   | Supplementary_Data_22.html  | RT-qPCR analysis - FOXL2 - Linear Mixed Model in R                                                                                                                                                                           |
| Fig05B | html | Supplementary Data   | Supplementary_Data_23.html  | RT-qPCR analysis - FGF9 - Linear Mixed Model in R                                                                                                                                                                            |
| Fig05B | xlsx | Supplementary Data   | Supplementary_Data_24.xlsx  | RT-qPCR analysis - SRY - data preparation for Linear Mixed Model in R                                                                                                                                                        |
| Fig05B | xlsx | Supplementary Data   | Supplementary_Data_25.xlsx  | RT-qPCR analysis - SOX9 - data preparation for Linear Mixed Model in R                                                                                                                                                       |
| Fig05B | xlsx | Supplementary Data   | Supplementary_Data_26.xlsx  | RT-qPCR analysis - WNT4 - data preparation for Linear Mixed Model in R                                                                                                                                                       |
| Fig05B | xlsx | Supplementary Data   | Supplementary_Data_27.xlsx  | RT-qPCR analysis - NR5A1 - data preparation for Linear Mixed Model in R                                                                                                                                                      |
| Fig05B | xlsx | Supplementary Data   | Supplementary_Data_28.xlsx  | RT-qPCR analysis - FOXL2 - data preparation for Linear Mixed Model in R                                                                                                                                                      |
| Fig05B | xlsx | Supplementary Data   | Supplementary_Data_29.xlsx  | RT-qPCR analysis - FGF9 - data preparation for Linear Mixed Model in R                                                                                                                                                       |
| Fig05  | html | Supplementary Data   | Supplementary_Data_30.html  | RT-qPCR analysis - SRY - outlier identification by the IQR method in R                                                                                                                                                       |
| Fig05  | html | Supplementary Data   | Supplementary_Data_31.html  | RT-qPCR analysis - SOX9 - outlier identification by the IQR method in R                                                                                                                                                      |
| Fig05  | html | Supplementary Data   | Supplementary_Data_32.html  | RT-qPCR analysis - WNT4 - outlier identification by the IQR method in R                                                                                                                                                      |
| Fig05  | html | Supplementary Data   | Supplementary_Data_33.html  | RT-qPCR analysis - NR5A1 - outlier identification by the IQR method in R                                                                                                                                                     |
| Fig05  | html | Supplementary Data   | Supplementary_Data_34.html  | RT-qPCR analysis - FOXL2 - outlier identification by the IQR method in R                                                                                                                                                     |
| Fig05  | html | Supplementary Data   | Supplementary_Data_35.html  | RT-qPCR analysis - FGF9 - outlier identification by the IQR method in R                                                                                                                                                      |
| Fig05B | xlsx | Supplementary Data   | Supplementary_Data_36.xlsx  | RT-qPCR analysis - SRY - Wild type versus mutant comparison                                                                                                                                                                  |
| Fig05B | xlsx | Supplementary Data   | Supplementary_Data_37.xlsx  | RT-qPCR analysis - SOX9 - Wild type versus mutant comparison                                                                                                                                                                 |
| Fig05B | xlsx | Supplementary Data   | Supplementary_Data_38.xlsx  | RT-qPCR analysis - WNT4 - Wild type versus mutant comparison                                                                                                                                                                 |
| Fig05B | xlsx | Supplementary Data   | Supplementary_Data_39.xlsx  | RT-qPCR analysis - NR5A1 - Wild type versus mutant comparison                                                                                                                                                                |
| Fig05B | xlsx | Supplementary Data   | Supplementary_Data_40.xlsx  | RT-qPCR analysis - FOXL2 - Wild type versus mutant comparison                                                                                                                                                                |
| Fig05B | xlsx | Supplementary Data   | Supplementary_Data_41.xlsx  | RT-qPCR analysis - FGF9 - Wild type versus mutant comparison                                                                                                                                                                 |
| Fig05A | xlsx | Supplementary Data   | Supplementary_Data_42.xlsx  | RT-qPCR analysis - iPS07-Wild type expression kinetics                                                                                                                                                                       |
| Fig05A | xlsx | Supplementary Data   | Supplementary_Data_43.xlsx  | RT-qPCR analysis - iPS09-Wild type expression kinetics                                                                                                                                                                       |
| Fig05A | xlsx | Supplementary Data   | Supplementary_Data_44.xlsx  | RT-qPCR analysis - iPS12-Wild type expression kinetics                                                                                                                                                                       |
| Fig05A | xlsx | Supplementary Data   | Supplementary_Data_45.xlsx  | RT-qPCR analysis - iPS26a-Wild type expression kinetics                                                                                                                                                                      |
| Fig05A | xlsx | Supplementary Data   | Supplementary_Data_46.xlsx  | RT-qPCR analysis - iPS26b-Wild type expression kinetics                                                                                                                                                                      |
| Fig05  | pzfx | Supplementary Data   | Supplementary_Data_47.pzfx  | RT-qPCR analysis: GraphPad Prism file summarizing all RT-qPCR experiment results                                                                                                                                             |
| Fig02  | pdf  | Supplementary Figure | Supplementary_Figure_01.pdf | Phylogenetic tree of the mammalian species used to build figure 2                                                                                                                                                            |
| Fig03  | pdf  | Supplementary Figure | Supplementary_Figure_02.pdf | SRY mutant alleles Sanger sequencing                                                                                                                                                                                         |
| Fig03  | pdf  | Supplementary Figure | Supplementary_Figure_03.pdf | Coexpression of SRY, NR5A1 and SOX9 in the human developing gonad                                                                                                                                                            |
| Fig04  | pdf  | Supplementary Figure | Supplementary_Figure_04.pdf | SRY DNA NR5A1 protein interaction                                                                                                                                                                                            |
| Fig05  | pdf  | Supplementary Figure | Supplementary_Figure_05.pdf | rt-qPCR experiments for <i>SRY</i> , <i>SOX9</i> , <i>WNT4</i> , <i>NR5A1</i> , <i>FOXL2</i> and FGF9 comparing wild type and mutant samples, with detailed analysis provided for each experiment in undifferentiated hiPSC. |
| Fig05  | pdf  | Supplementary Figure | Supplementary_Figure_06.pdf | <i>NR5A1</i> expression throughout the differentiation process of wild type hiPSCs.                                                                                                                                          |
| Fig05  | pdf  | Supplementary Figure | Supplementary_Figure_07.pdf | <i>FGF9</i> expression throughout the differentiation process of wild type hiPSCs.                                                                                                                                           |

|       |     |                      |                             |                                                                                                                                                                                          |
|-------|-----|----------------------|-----------------------------|------------------------------------------------------------------------------------------------------------------------------------------------------------------------------------------|
| Fig05 | pdf | Supplementary Figure | Supplementary_Figure_08.pdf | <i>FOXL2</i> expression throughout the differentiation process of wild type hiPSCs.                                                                                                      |
| Fig05 | pdf | Supplementary Figure | Supplementary_Figure_09.pdf | rt-qPCR experiments for <i>SRY</i> , <i>SOX9</i> , <i>WNT4</i> , <i>FOXL2</i> comparing wild type and mutant samples, with detailed analysis provided for each experiment and timepoint. |
| Fig05 | pdf | Supplementary Figure | Supplementary_Figure_10.pdf | <i>NR5A1</i> and <i>FGF9</i> comparing wild type and mutant samples, with detailed analysis provided for each experiment and timepoint.                                                  |
| Fig05 | pdf | Supplementary Figure | Supplementary_Figure_11.pdf | Comparison of <i>SRY</i> , <i>SOX9</i> , <i>NR5A1</i> , <i>WNT4</i> , <i>FOXL2</i> , and <i>FGF9</i> expression throughout the differentiation process of wild type hiPSCs.              |
| Fig05 | pdf | Supplementary Figure | Supplementary_Figure_12.pdf | Flowchart depicting the transformation of raw data into Figures                                                                                                                          |
| Fig03 | pdf | Supplementary Table  | Supplementary_Table_01.pdf  | Table case report                                                                                                                                                                        |
