# Supplementary material for: A conserved NR5A1-responsive enhancer regulates SRY in testis-determination
Source: PubMed Central journal article supplement (PMC10981742; doi:10.1038/s41467-024-47162-2), 2024-03-30
Supplement: 41467_2024_47162_MOESM3_ESM.pdf [file 41467_2024_47162_MOESM3_ESM.pdf]

## **Description of Additional Supplementary Files:**

**Supplementary Data 1:** annotated SRY locus - CLC main workbench file - SRY - Complete locus

**Supplementary Data 2:** annotated SRY locus - CLC main workbench file - SRY - 7386bp sequence fragment

**Supplementary Data 3:** annotated SRY locus - CLC main workbench file - SRY - 83 species sequence list

**Supplementary Data 4:** annotated SRY locus - CLC main workbench file - SRY - 83 species sequence alignment

**Supplementary Data 5:** annotated SRY locus - CLC main workbench file - SRY - 17 species sequence alignment

**Supplementary Data 6:** List of the mammalian species used in this study

**Supplementary Data 7:** Genomatix predicted transcription binding sites in the E250 enhancer

**Supplementary Data 8:** H1a1 haplogroup

**Supplementary Data 9:** Luciferase: annotated Plasmid-pcDNA3-Myc2X-NR5A1 - CLC main workbench file

**Supplementary Data 10:** Luciferase: annotated Plasmid-pCMV-Renilla-AF025843 - CLC main workbench file

**Supplementary Data 11:** Luciferase: annotated Plasmid-pGL4.26\_link5\_E250-Reference - CLC main workbench file

**Supplementary Data 12:** Luciferase: annotated Plasmid-pGL4.26\_link5\_pGL4.26\_link5\_E250-Variant-1

**Supplementary Data 13:** Luciferase: annotated Plasmid-pGL4.26\_link5\_pGL4.26\_link5\_E250-Variant-2

**Supplementary Data 14:** Luciferase: annotated Plasmid-pGL4.26\_link5\_E250- $\Delta$ NR5A1 - CLC main workbench file

**Supplementary Data 15:** Luciferase on HEK293T cells - statistical analysis in R

**Supplementary Data 16:** Luciferase on HeLa cells - statistical analysis in R

**Supplementary Data 17:** RT-qPCR analysis - AMH - Wild type versus mutant comparison

**Supplementary Data 18:** RT-qPCR analysis - SRY - Linear Mixed Model in R

**Supplementary Data 19:** RT-qPCR analysis - SOX9 - Linear Mixed Model in R

**Supplementary Data 20:** RT-qPCR analysis - WNT4 - Linear Mixed Model in R

**Supplementary Data 21:** RT-qPCR analysis - NR5A1 - Linear Mixed Model in R

**Supplementary Data 22:** RT-qPCR analysis - FOXL2 - Linear Mixed Model in R

**Supplementary Data 23:** RT-qPCR analysis - FGF9 - Linear Mixed Model in R

**Supplementary Data 24:** RT-qPCR analysis - SRY - data preparation for Linear Mixed Model in R

**Supplementary Data 25:** RT-qPCR analysis - SOX9 - data preparation for Linear Mixed Model in R

**Supplementary Data 26:** RT-qPCR analysis - WNT4 - data preparation for Linear Mixed Model in R

**Supplementary Data 27:** RT-qPCR analysis - NR5A1 - data preparation for Linear Mixed Model in R

**Supplementary Data 28:** RT-qPCR analysis - FOXL2 - data preparation for Linear Mixed Model in R

**Supplementary Data 29:** RT-qPCR analysis - FGF9 - data preparation for Linear Mixed Model in R

**Supplementary Data 30:** RT-qPCR analysis - SRY - outlier identification by the IQR method in R

**Supplementary Data 31:** RT-qPCR analysis - SOX9 - outlier identification by the IQR method in R

**Supplementary Data 32:** RT-qPCR analysis - WNT4 - outlier identification by the IQR method in R

**Supplementary Data 33:** RT-qPCR analysis - NR5A1 - outlier identification by the IQR method in R

**Supplementary Data 34:** RT-qPCR analysis - FOXL2 - outlier identification by the IQR method in R

**Supplementary Data 35:** RT-qPCR analysis - FGF9 - outlier identification by the IQR method in R

**Supplementary Data 36:** RT-qPCR analysis - SRY - Wild type versus mutant comparison

**Supplementary Data 37:** RT-qPCR analysis - SOX9 - Wild type versus mutant comparison

**Supplementary Data 38:** RT-qPCR analysis - WNT4 - Wild type versus mutant comparison

**Supplementary Data 39:** RT-qPCR analysis - NR5A1 - Wild type versus mutant comparison

**Supplementary Data 40:** RT-qPCR analysis - FOXL2 - Wild type versus mutant comparison

**Supplementary Data 41:** RT-qPCR analysis - FGF9 - Wild type versus mutant comparison

**Supplementary Data 42:** RT-qPCR analysis - iPS07-Wild type expression kinetics

**Supplementary Data 43:** RT-qPCR analysis - iPS09-Wild type expression kinetics

**Supplementary Data 44:** RT-qPCR analysis - iPS12-Wild type expression kinetics

**Supplementary Data 45:** RT-qPCR analysis - iPS26a-Wild type expression kinetics

**Supplementary Data 46:** RT-qPCR analysis - iPS26b-Wild type expression kinetics

**Supplementary Data 47:** RT-qPCR analysis: GraphPad Prism file summarizing all RT-qPCR experiment results

**Supplementary Data 48:** Statistical tests - Figure 4 and Figure 5
